# Supplementary material for: STING antagonists, synthesized via Povarov–Doebner type multicomponent reaction
Source: Royal Society of Chemistry journal article supplement (doi:10.1039/d3md00061c), 2023-01-01

## **Supplementary Information**

### **STING antagonists, synthesized via Povarov-Doebner type multicomponent reaction**

Wilson W.S Ong<sup>a</sup>, Neetu Dayal<sup>a</sup>, Riddhi Chaudhuri<sup>a</sup>, Jones Lamptey<sup>a</sup>, Herman O. Sintim\*<sup>abc</sup>

<sup>a</sup>Department of Chemistry, Purdue University, 560 Oval Drive, West Lafayette, Indiana 47907, United States

<sup>b</sup>Center for Drug Discovery, Purdue University, 720 Clinic Drive, West Lafayette, Indiana 47907, United States

<sup>c</sup>Purdue Institute of Inflammation, Immunology, and Infectious Disease, West Lafayette, IN, 47907, USA

\*Corresponding author. Email: [hsintim@purdue.edu](mailto:hsintim@purdue.edu)

I. <sup>1</sup>H and <sup>13</sup>C Spectra of compounds

II. HPLC Purity Chromatograms

III. Full blots of Western used in the paper

# I. <sup>1</sup>H and <sup>13</sup>C Spectra of compounds

## <sup>1</sup>H spectra of HSD1077

ND-02-1077r.1.fid

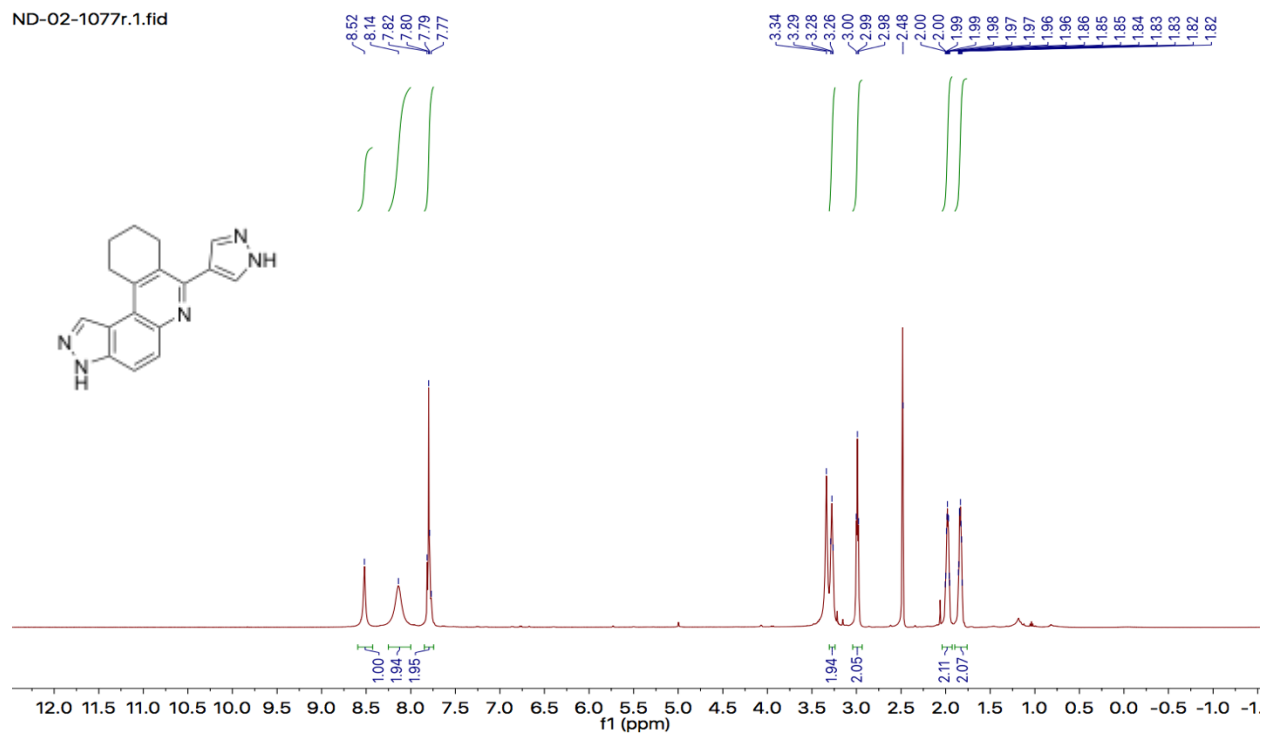

## <sup>13</sup>C spectra of HSD1077

ND-02-1077r.2.fid

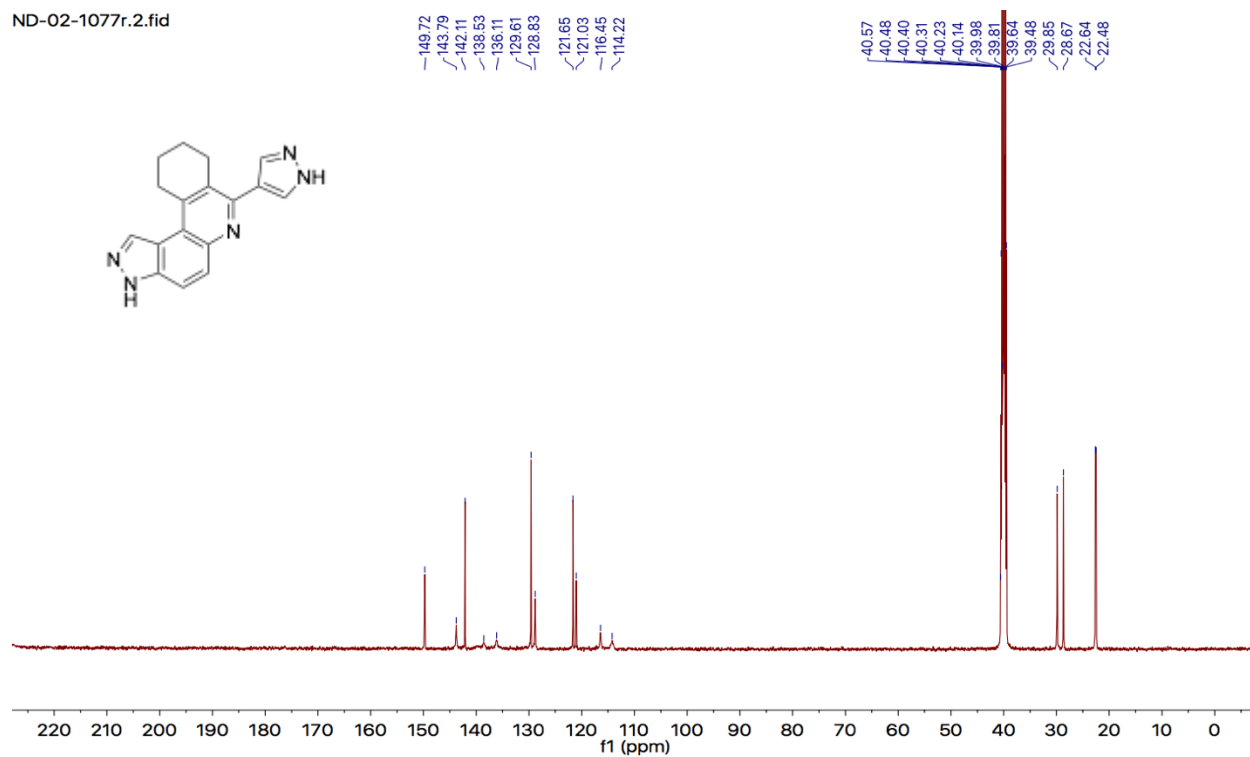

### <sup>1</sup>H spectra of 1

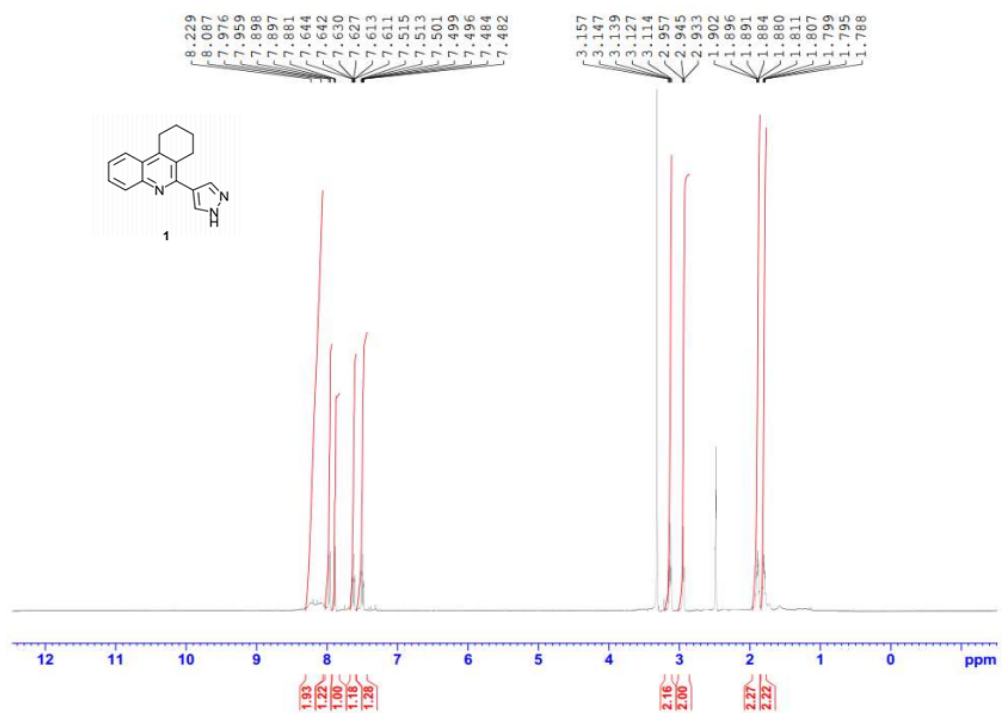

### <sup>13</sup>C spectra of 1

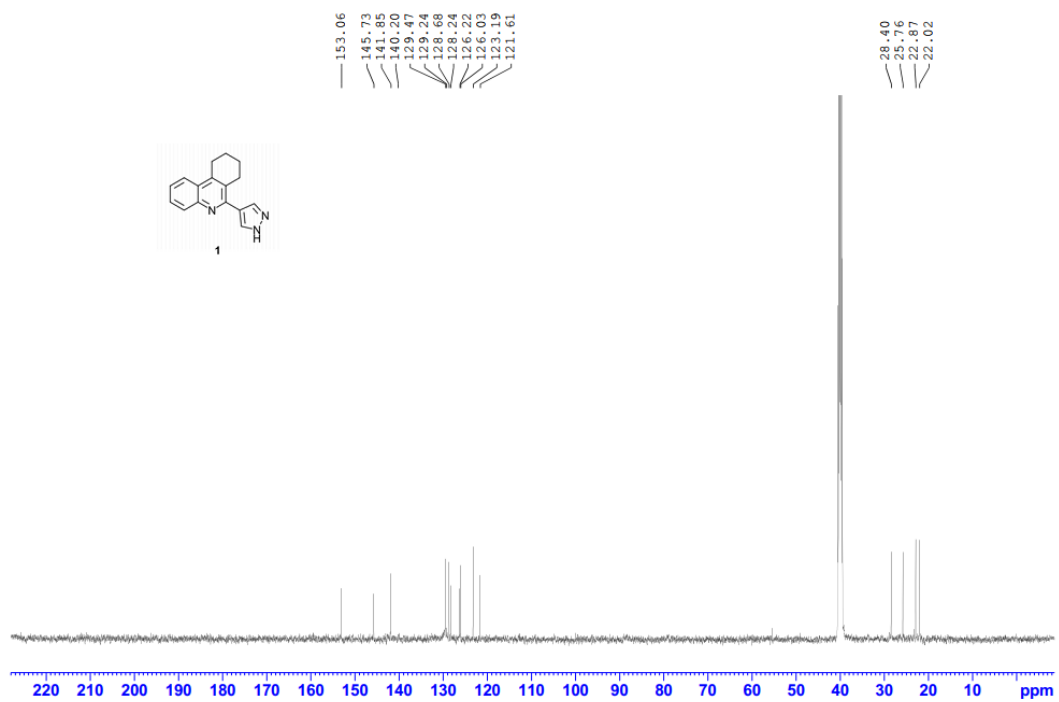

**<sup>1</sup>H spectra of 2**

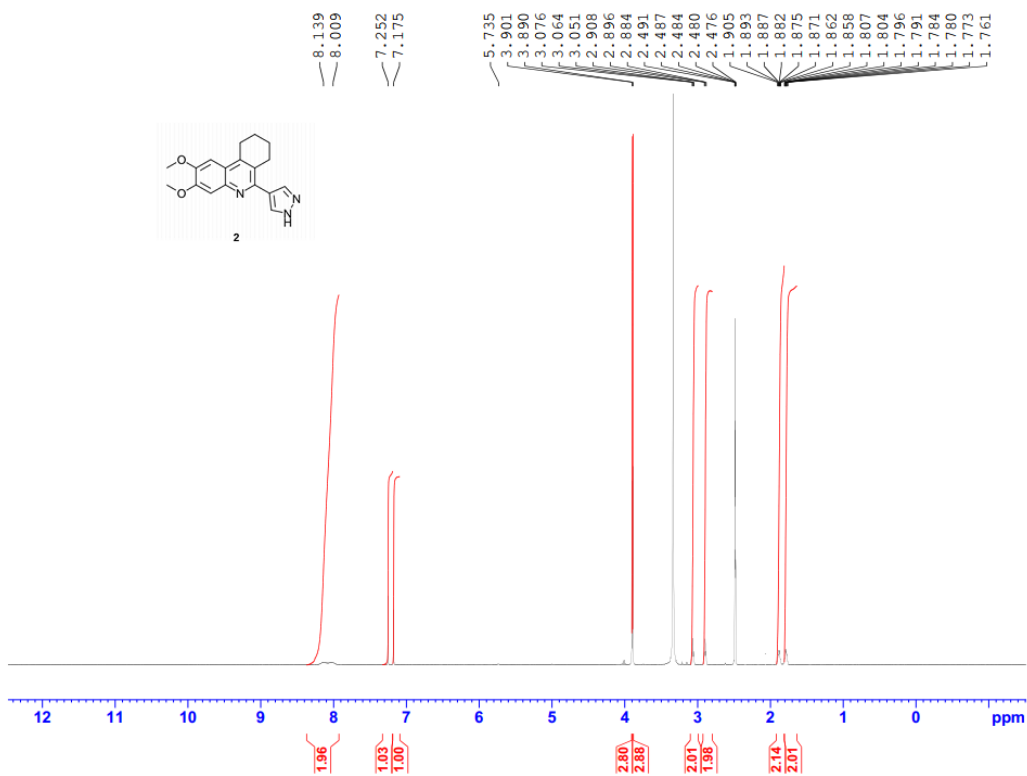

**<sup>13</sup>C spectra of 2**

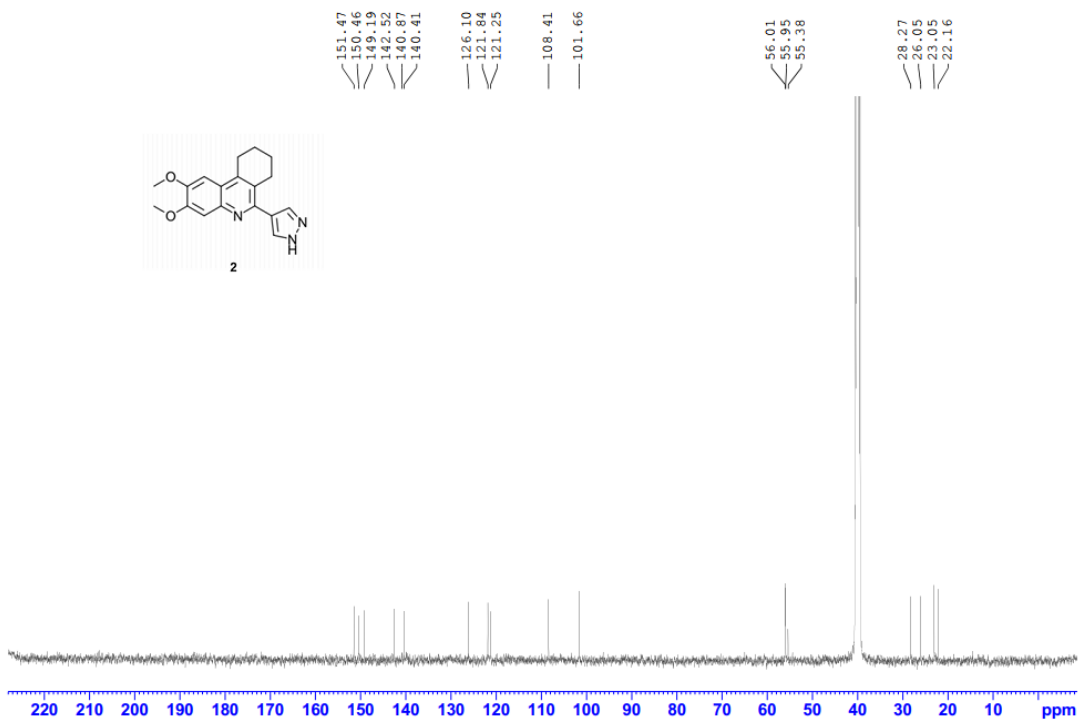

### <sup>1</sup>H spectra of 3

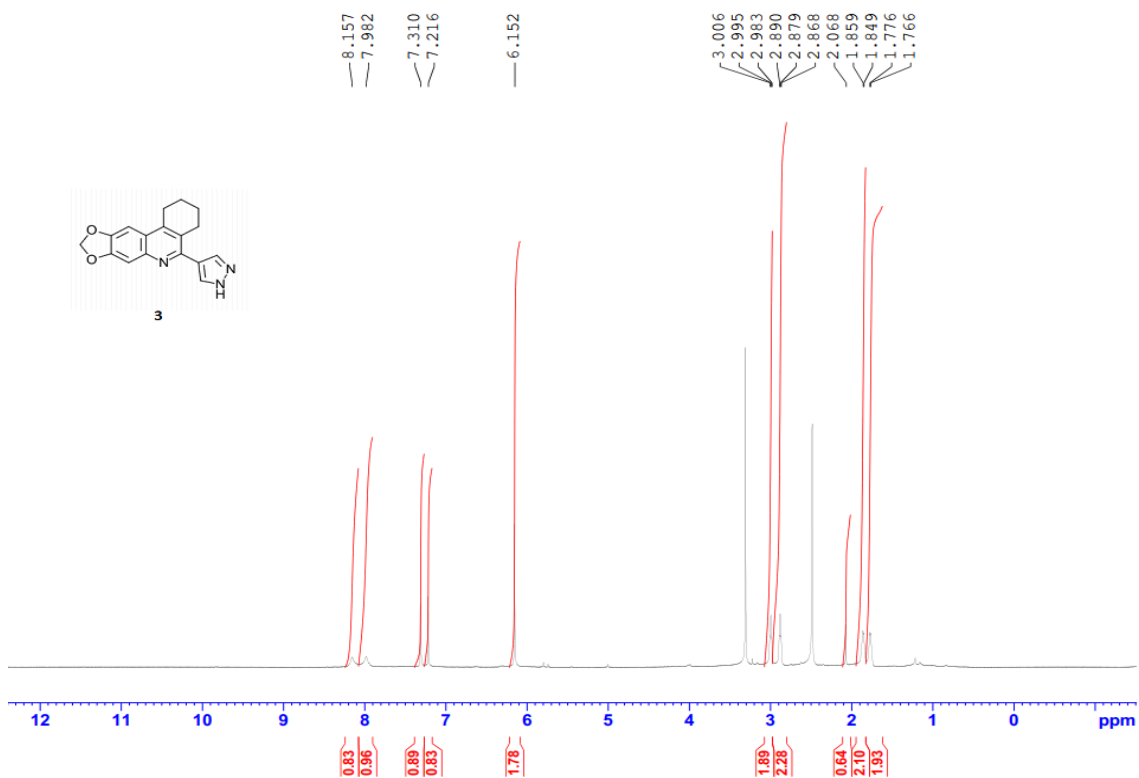

### <sup>13</sup>C spectra of 3

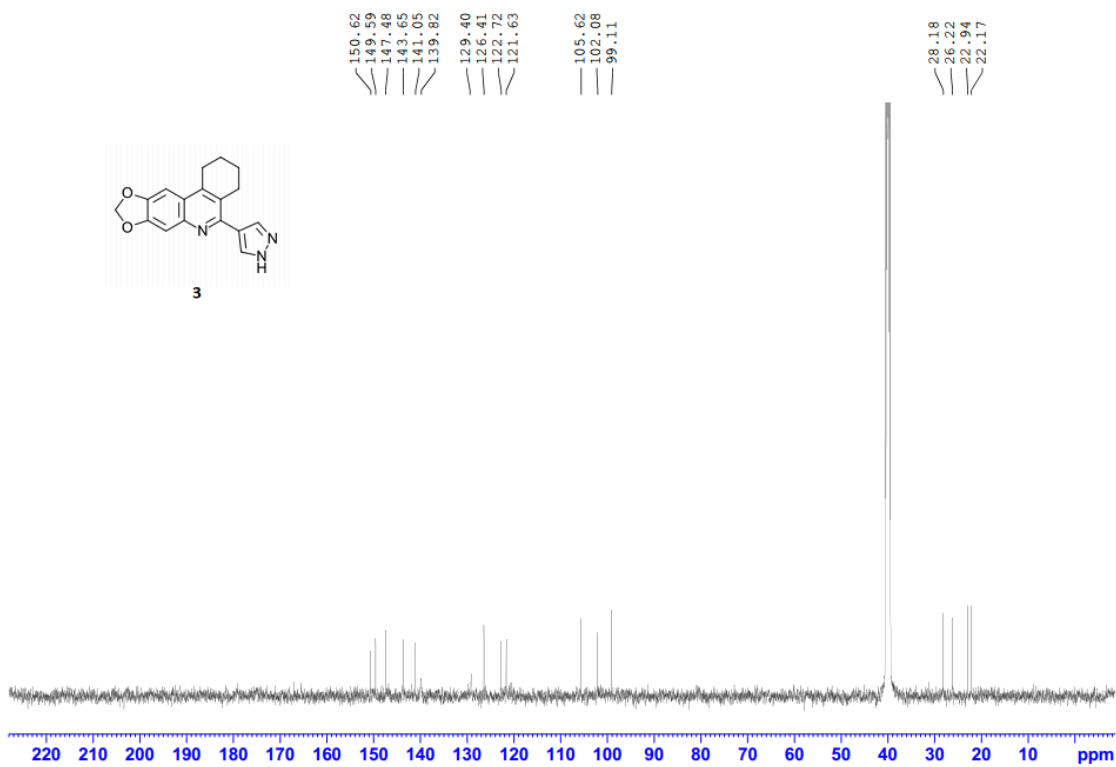

## <sup>1</sup>H spectra of 5

ndayal-4049.1.fid

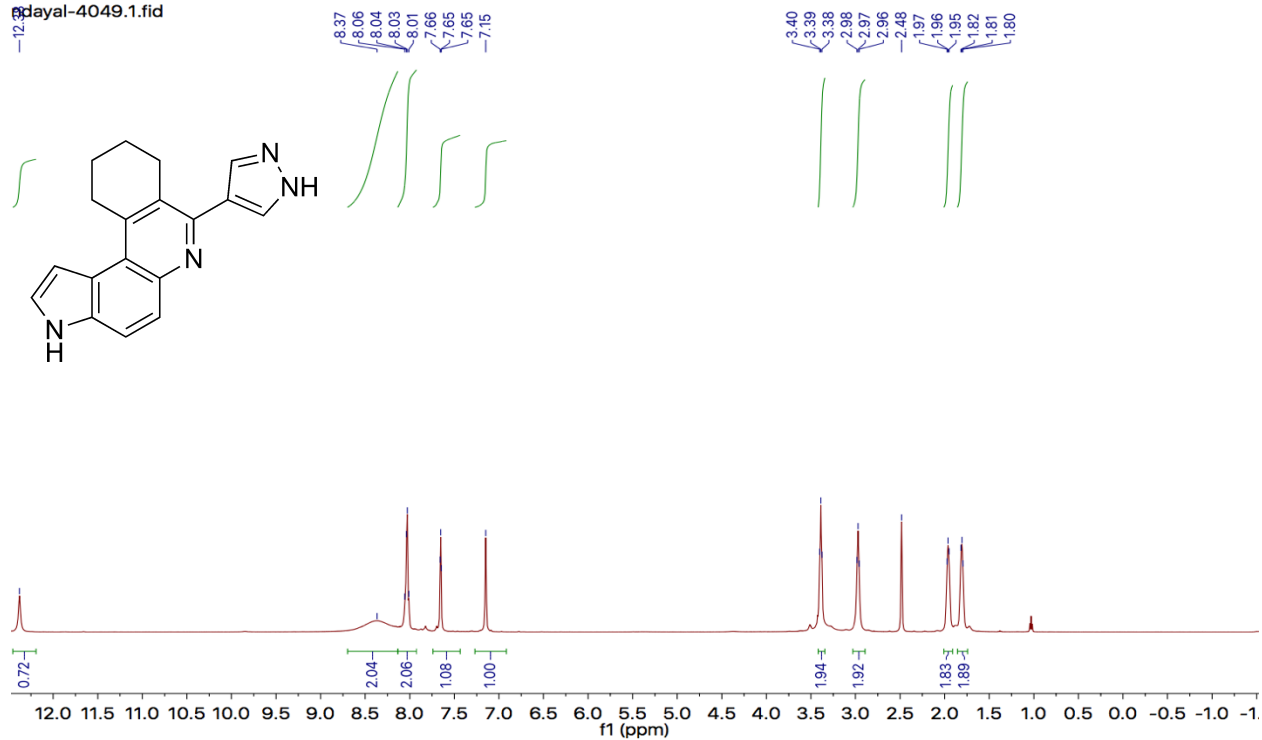

## <sup>13</sup>C spectra of 5

ndayal-4049r800.2.fid

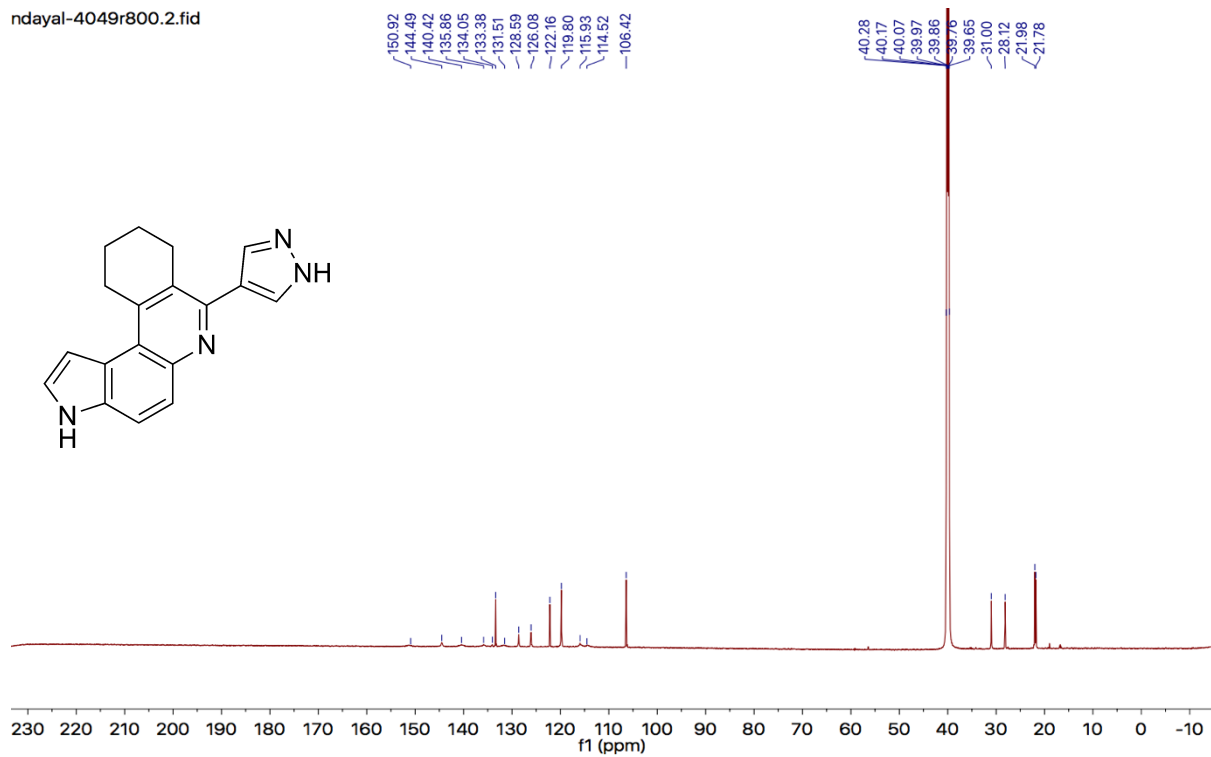

## <sup>1</sup>H spectra of 6

ndayal-4050e800.1.fid

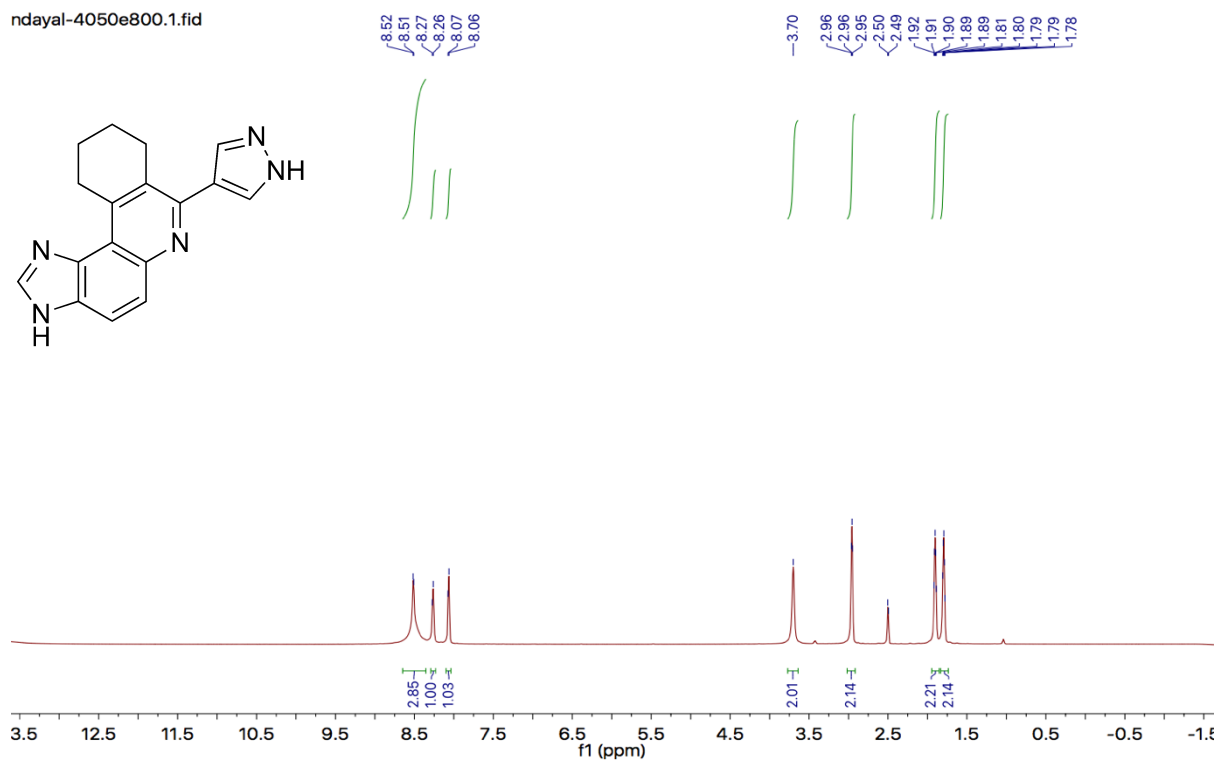

## <sup>13</sup>C spectra of 6

ndayal-4050e800.2.fid

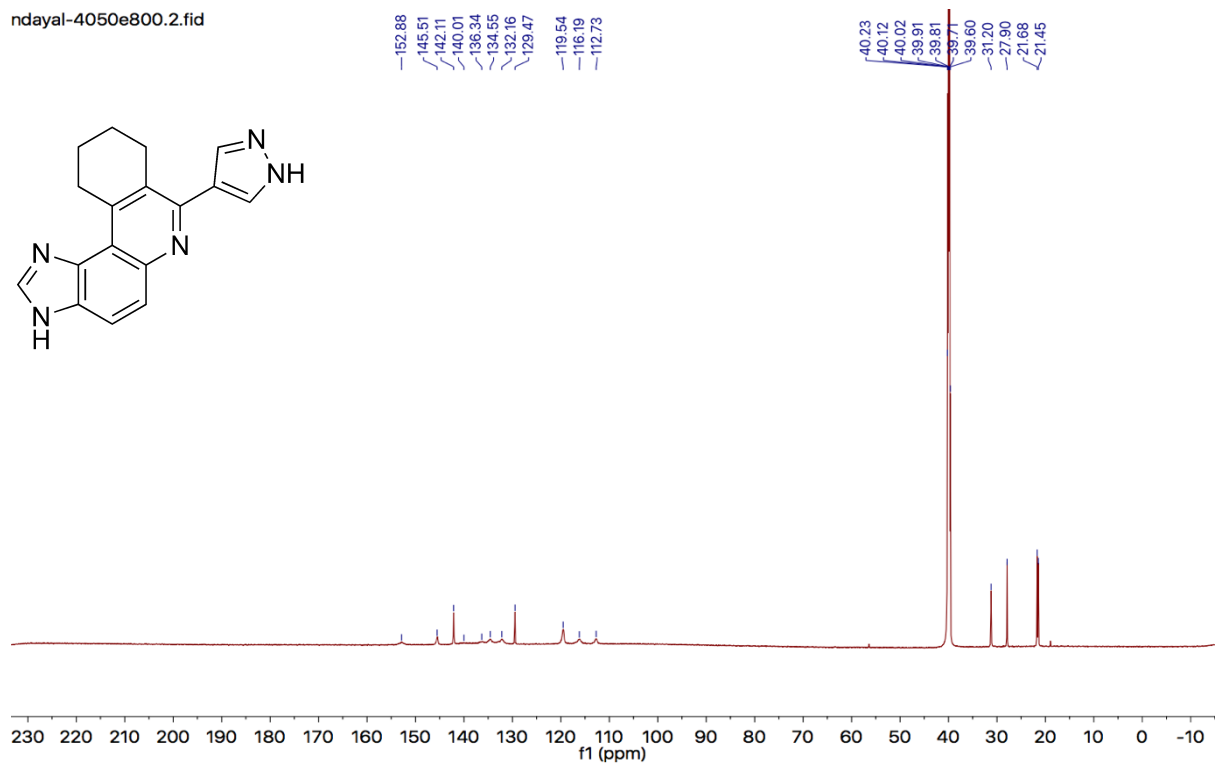

### <sup>1</sup>H spectra of 7

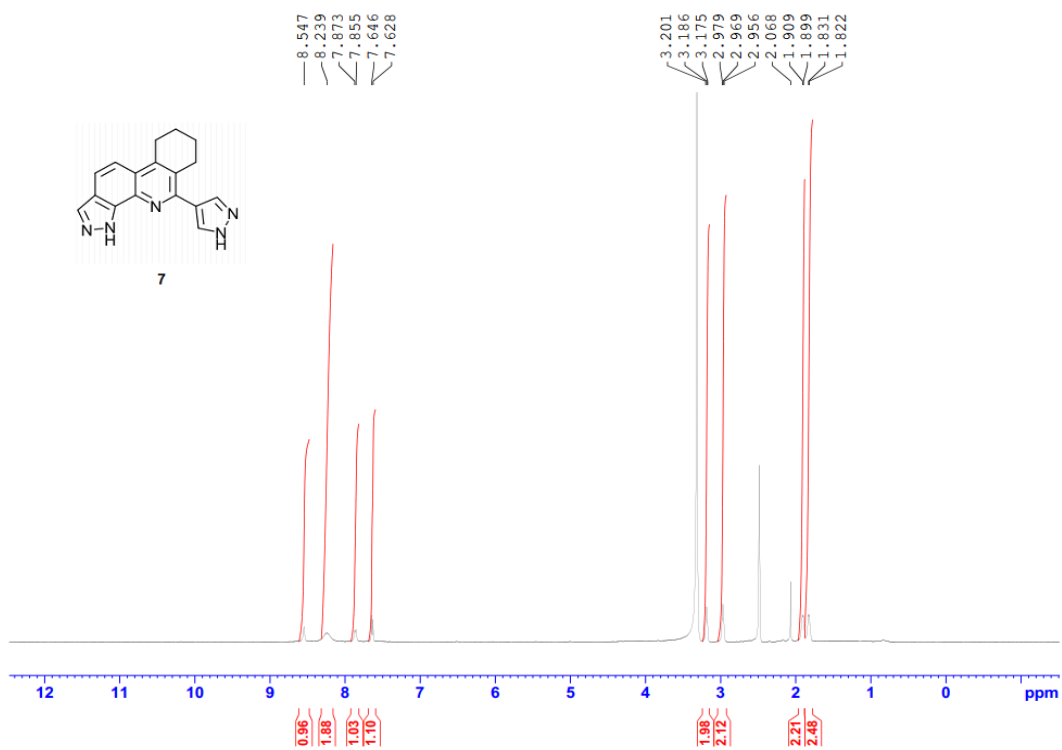

### <sup>13</sup>C spectra of 7

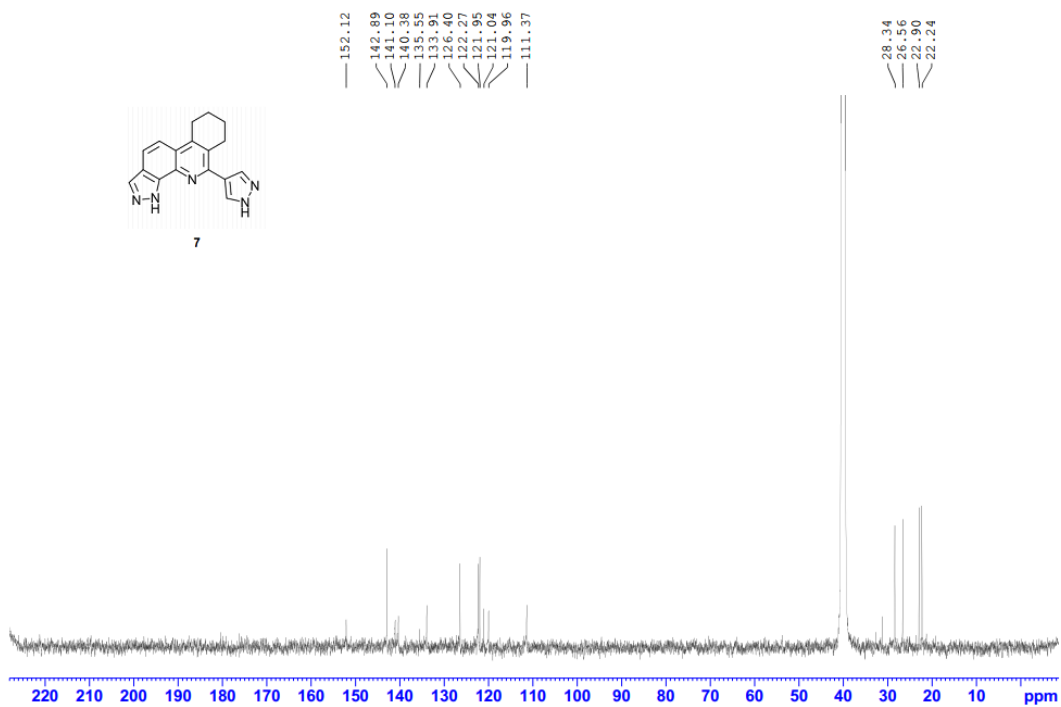



<sup>1</sup>H spectra of 8

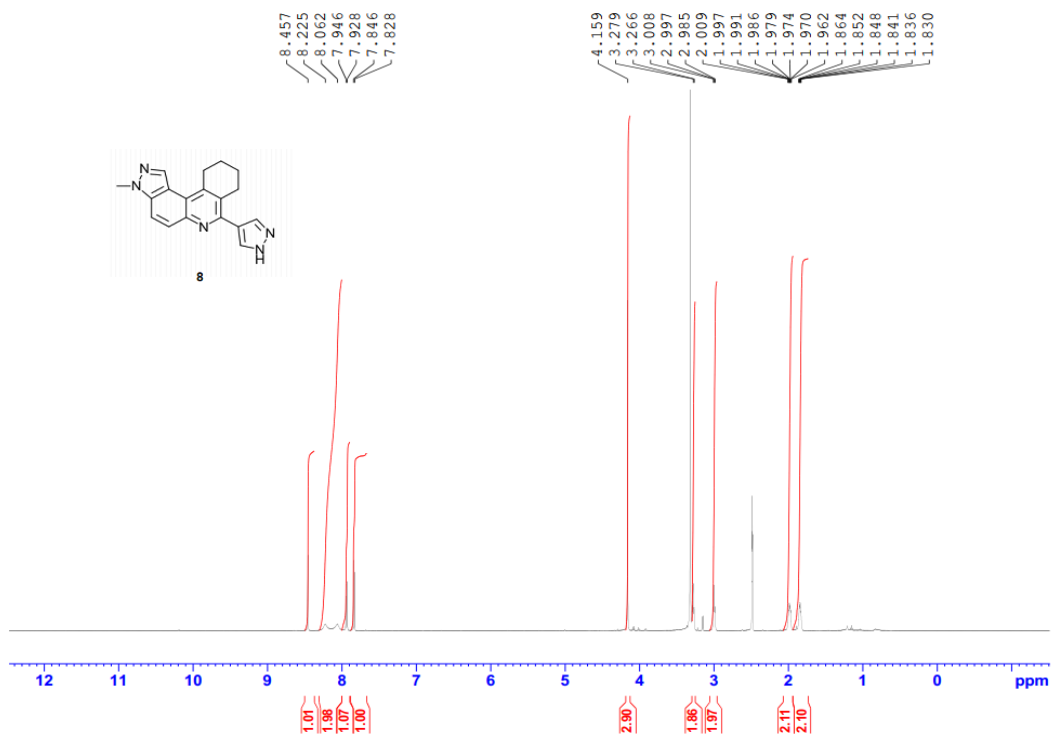

<sup>13</sup>C spectra of 8

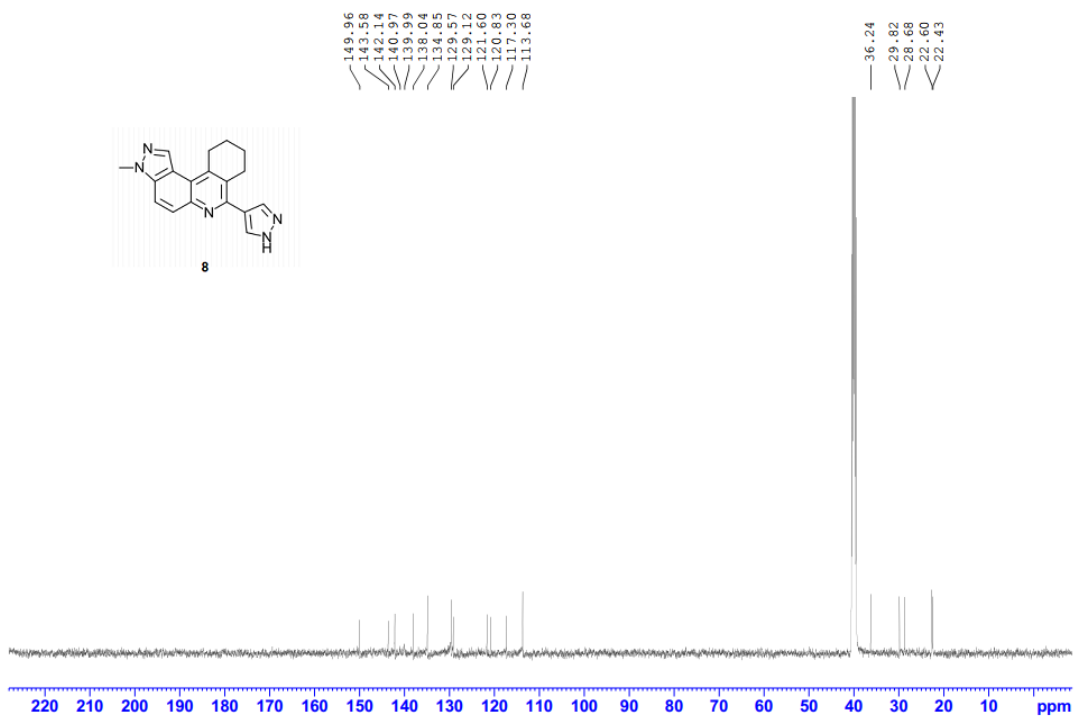

<sup>1</sup>H spectra of 9

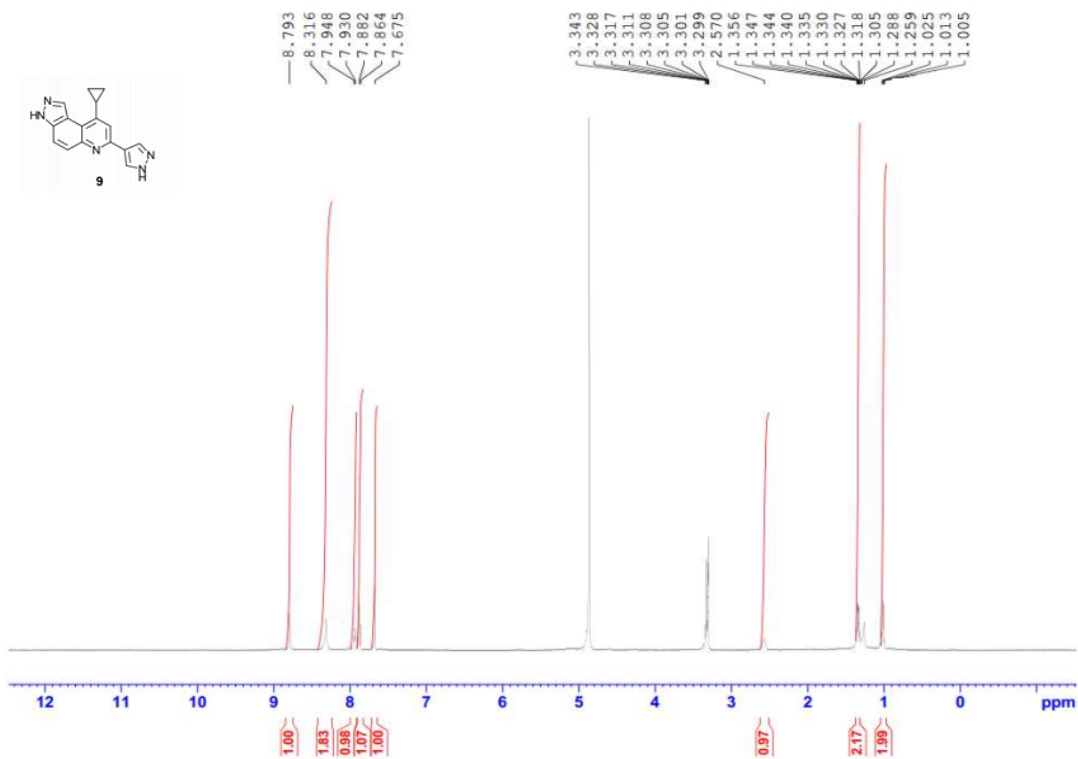

<sup>13</sup>C spectra of 9

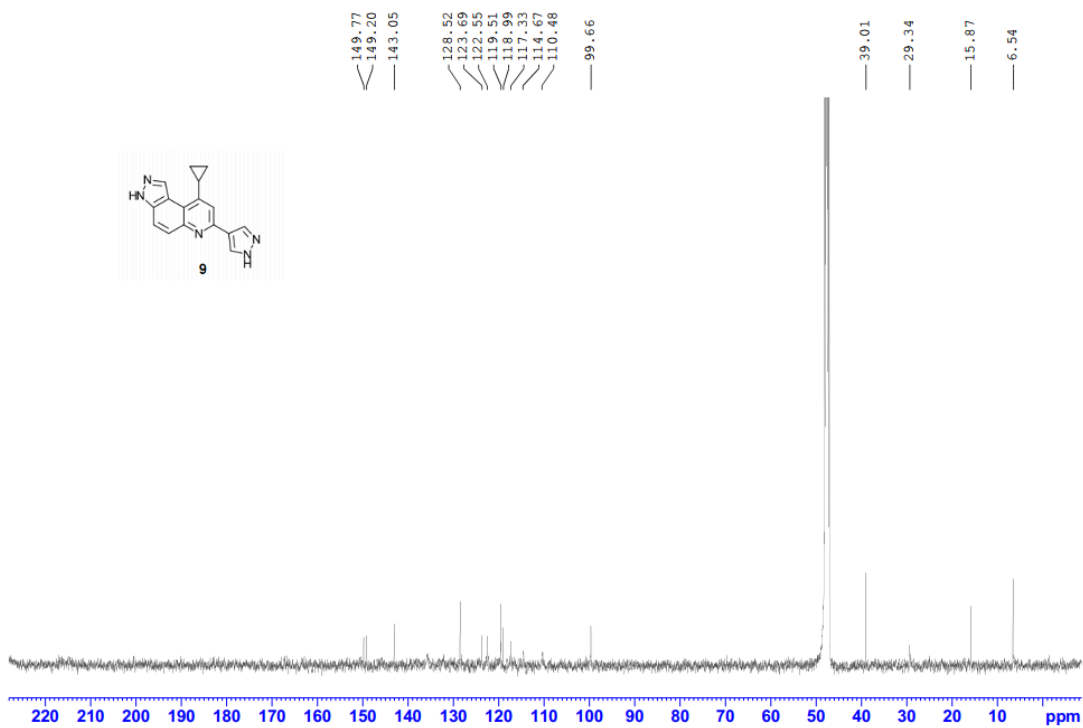

### <sup>1</sup>H spectra of 10

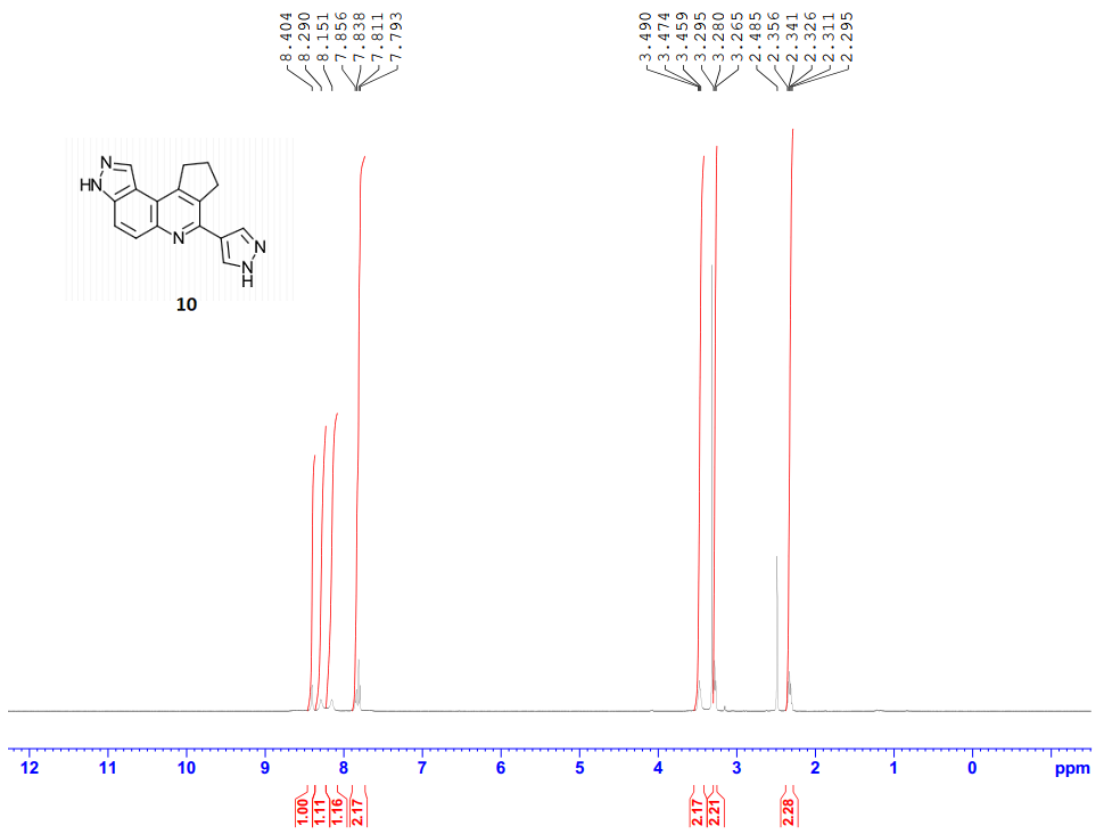

### <sup>13</sup>C spectra of 10

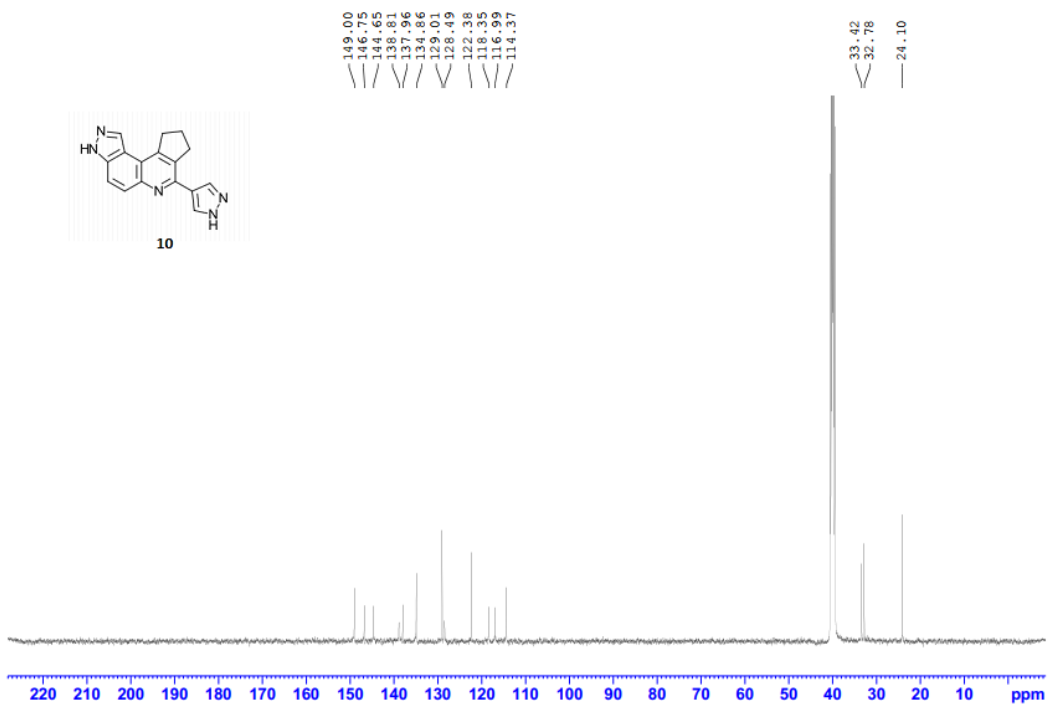

**<sup>1</sup>H spectra of 11**

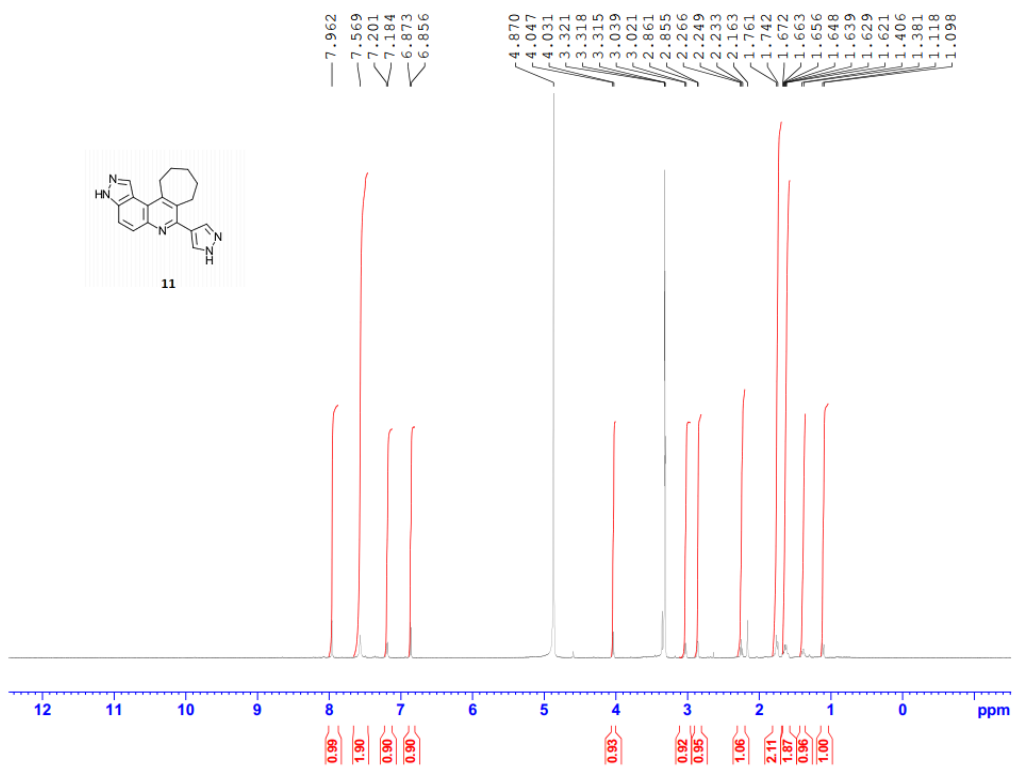

**<sup>13</sup>C spectra of 11**

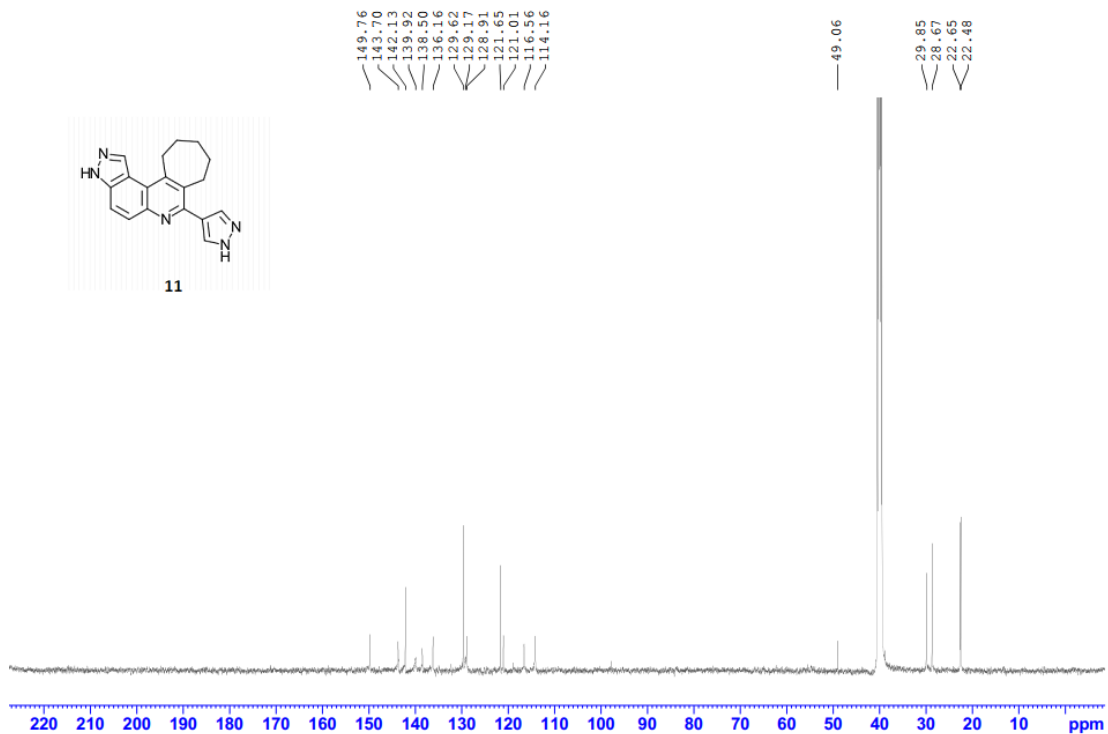

### <sup>1</sup>H spectra of 12

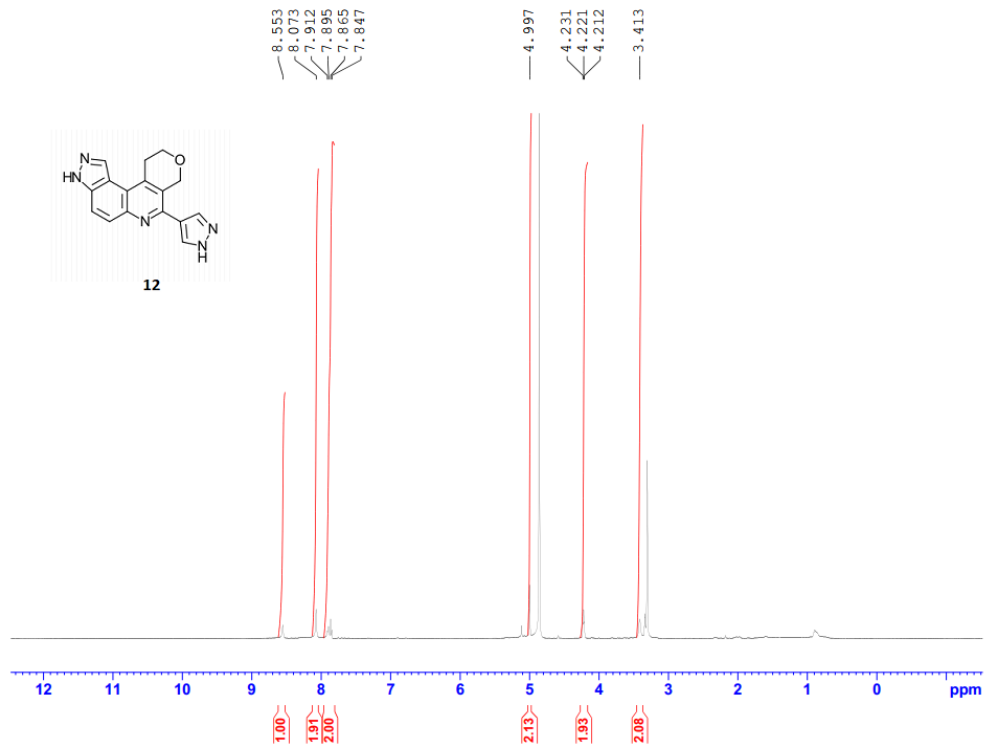

### <sup>13</sup>C spectra of 12

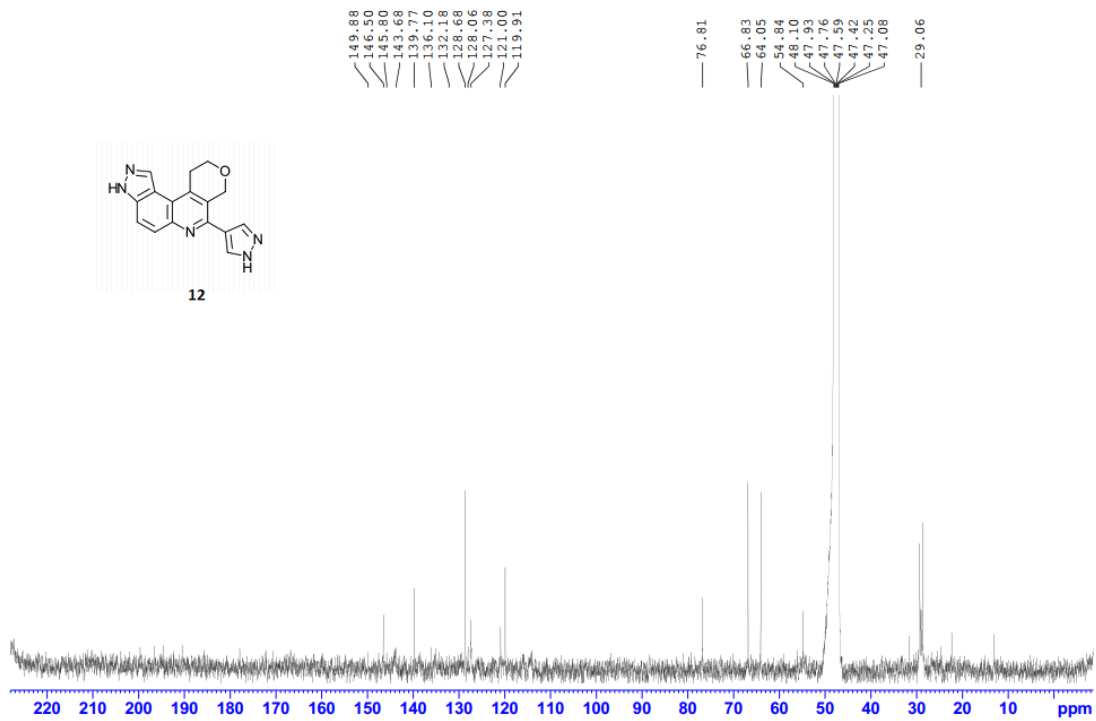

### <sup>1</sup>H spectra of 13

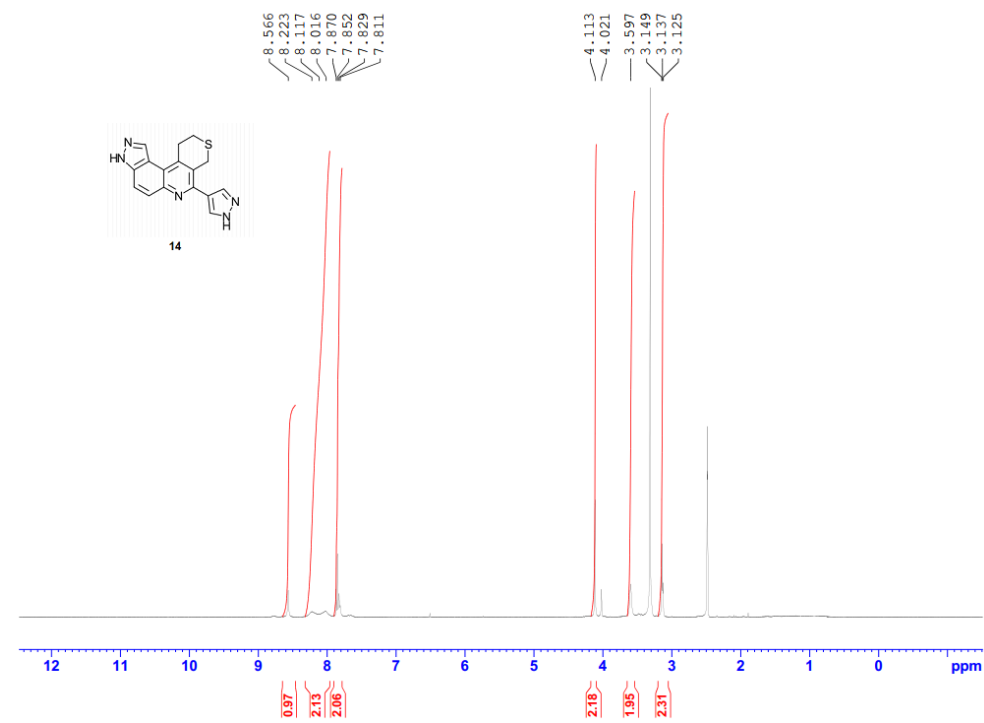

### <sup>13</sup>C spectra of 13

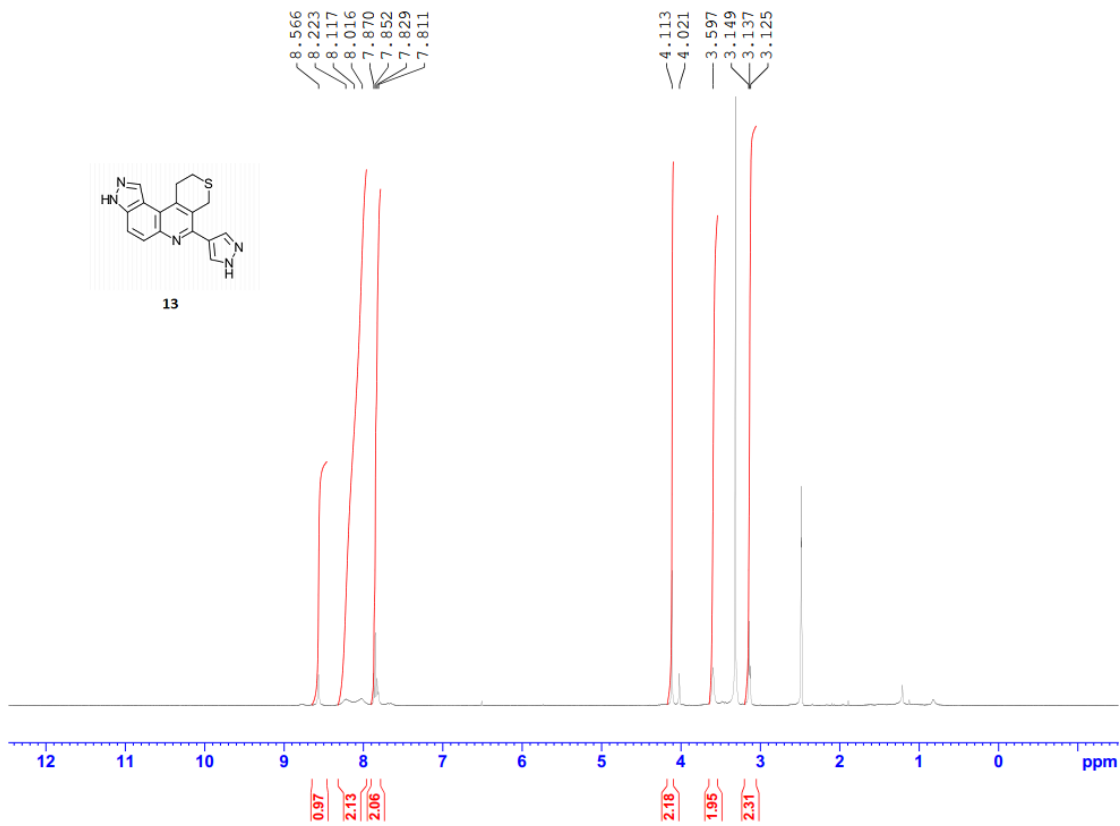

**<sup>1</sup>H spectra of 14**

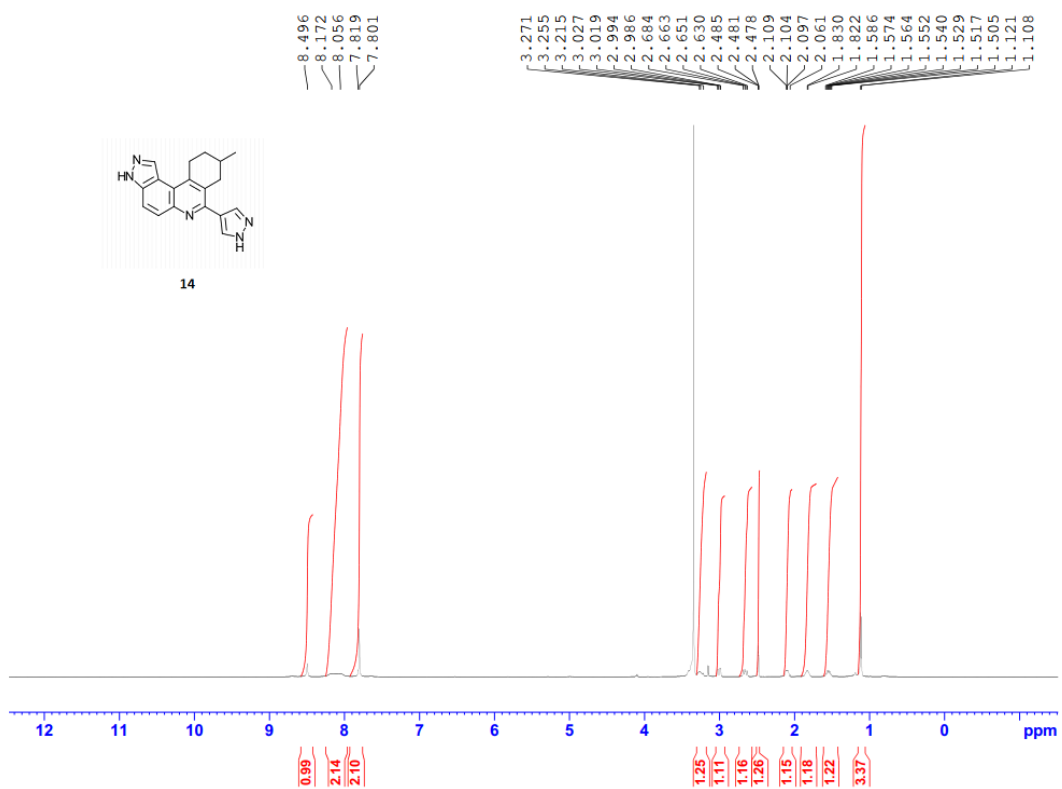

**<sup>13</sup>C spectra of 14**

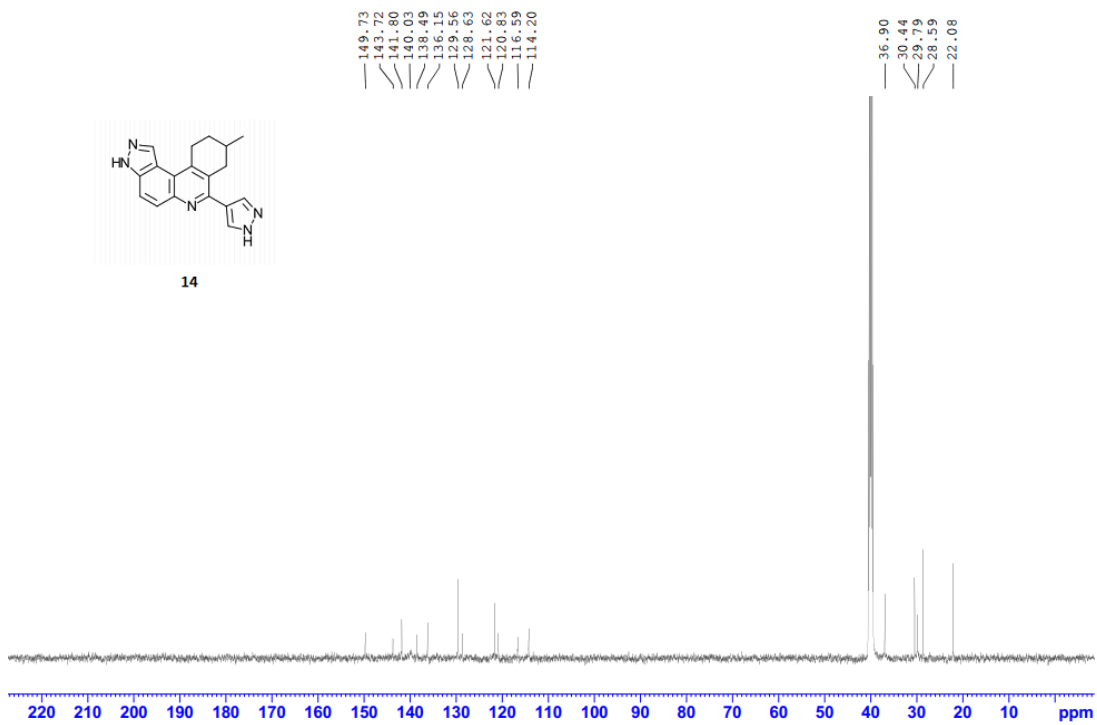





# <sup>1</sup>H spectra of 15

ndayal-nh2.1.fid

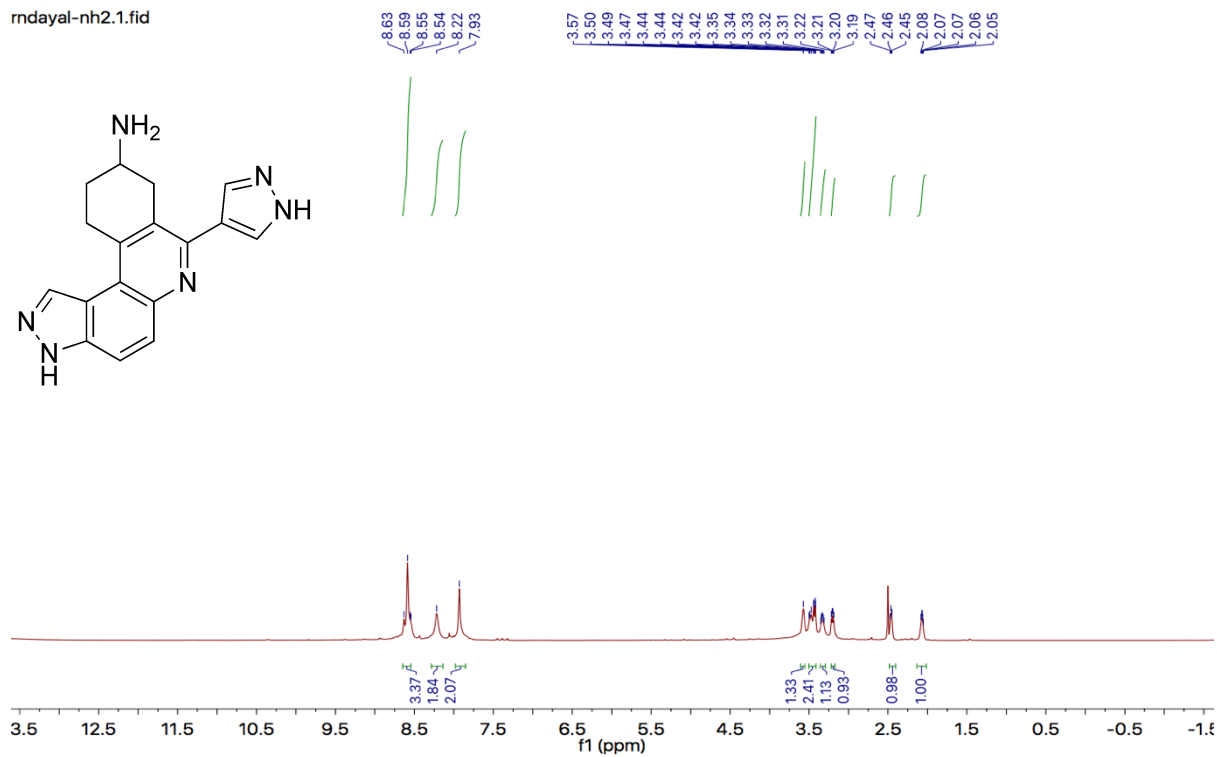

# <sup>13</sup>C spectra of 15

ndayal-nh2.3.fid

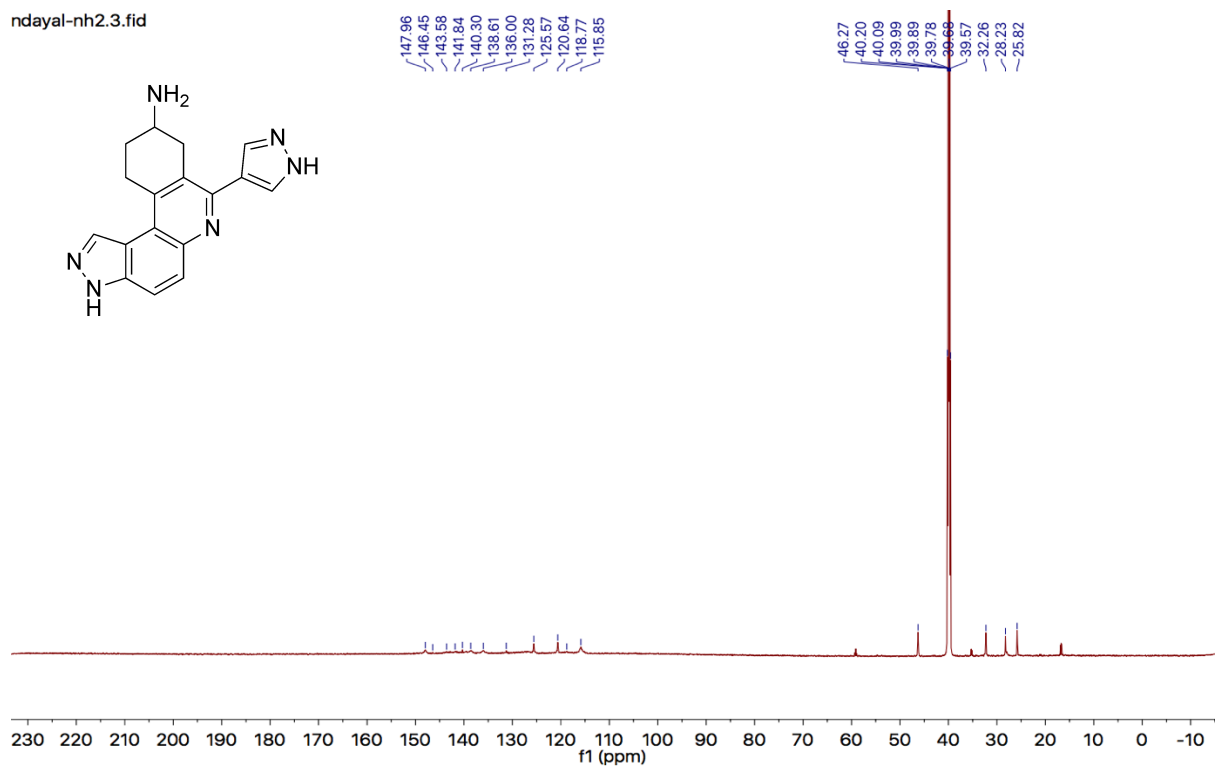

## <sup>1</sup>H spectra of 16

ndayal-oh.1.fid

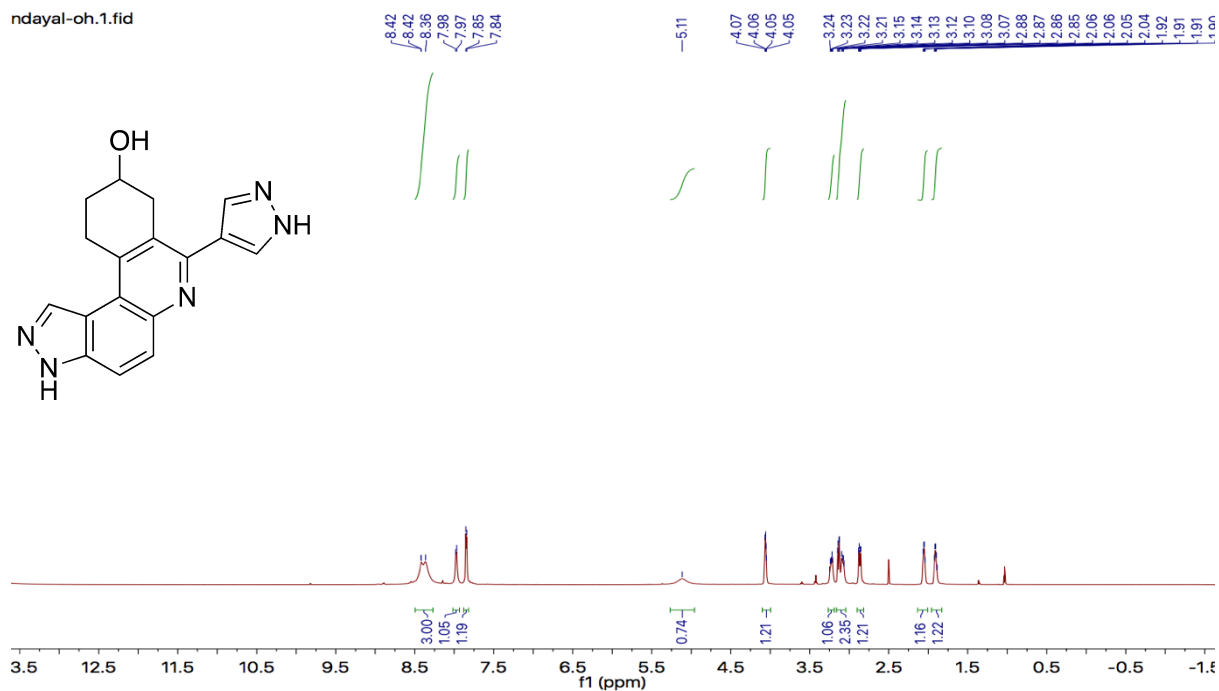

## <sup>13</sup>C spectra of 16

ndayal-oh.2.fid

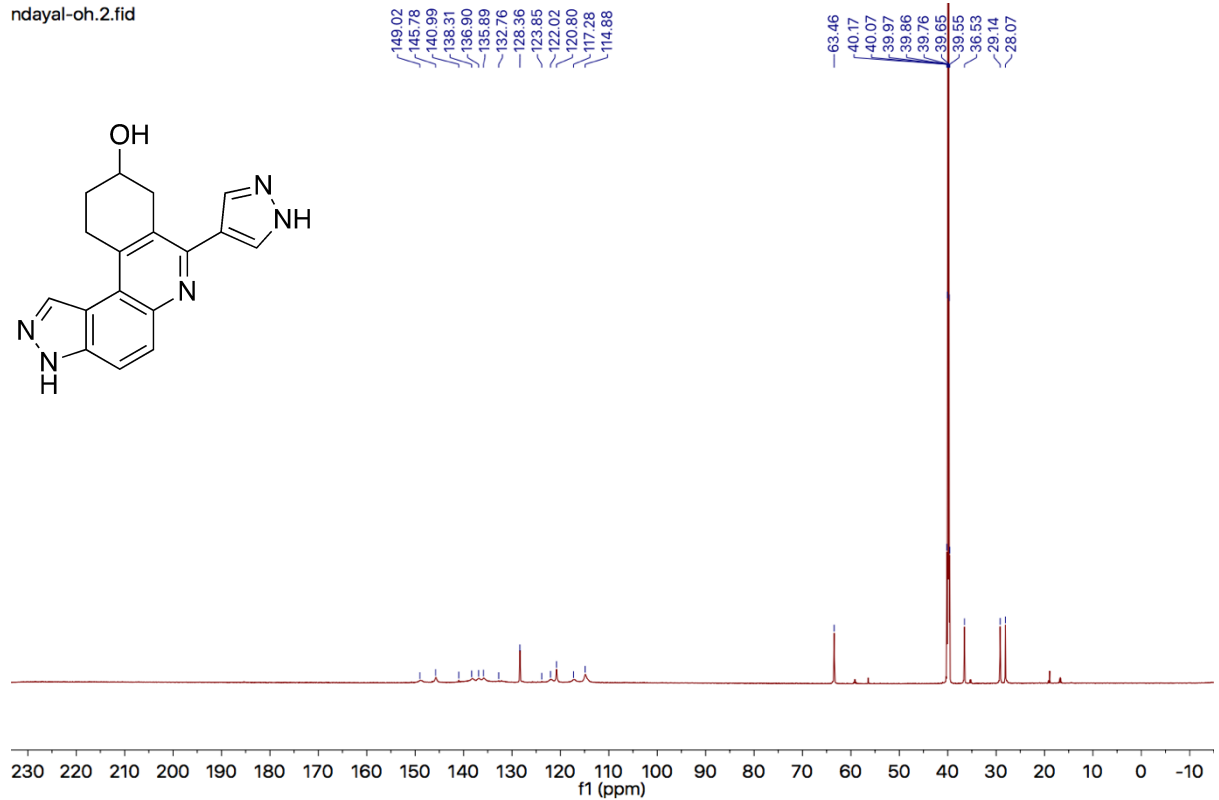

## <sup>1</sup>H spectra of 21

ndayal-4036r.1.fid

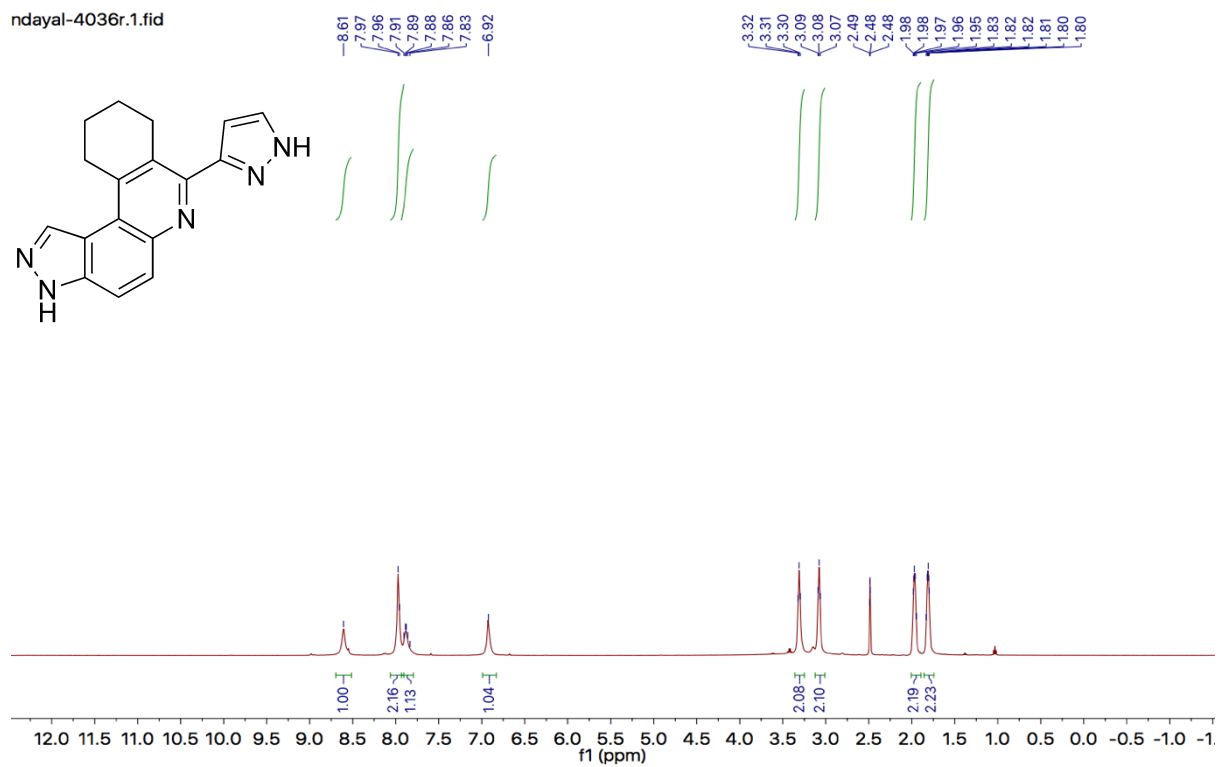

## <sup>13</sup>C spectra of 21

ndayal-4036r 800.2.fid

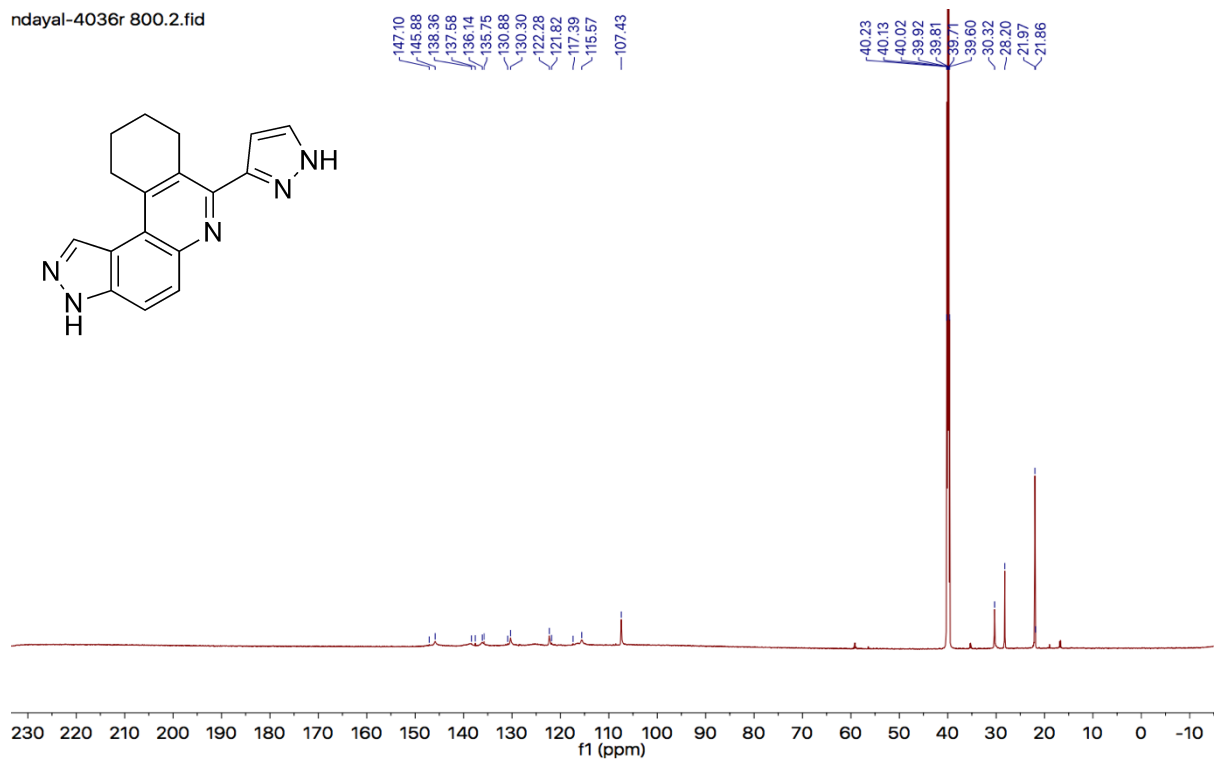

### <sup>1</sup>H spectra of 22

ND-02-1296rr.1.fid

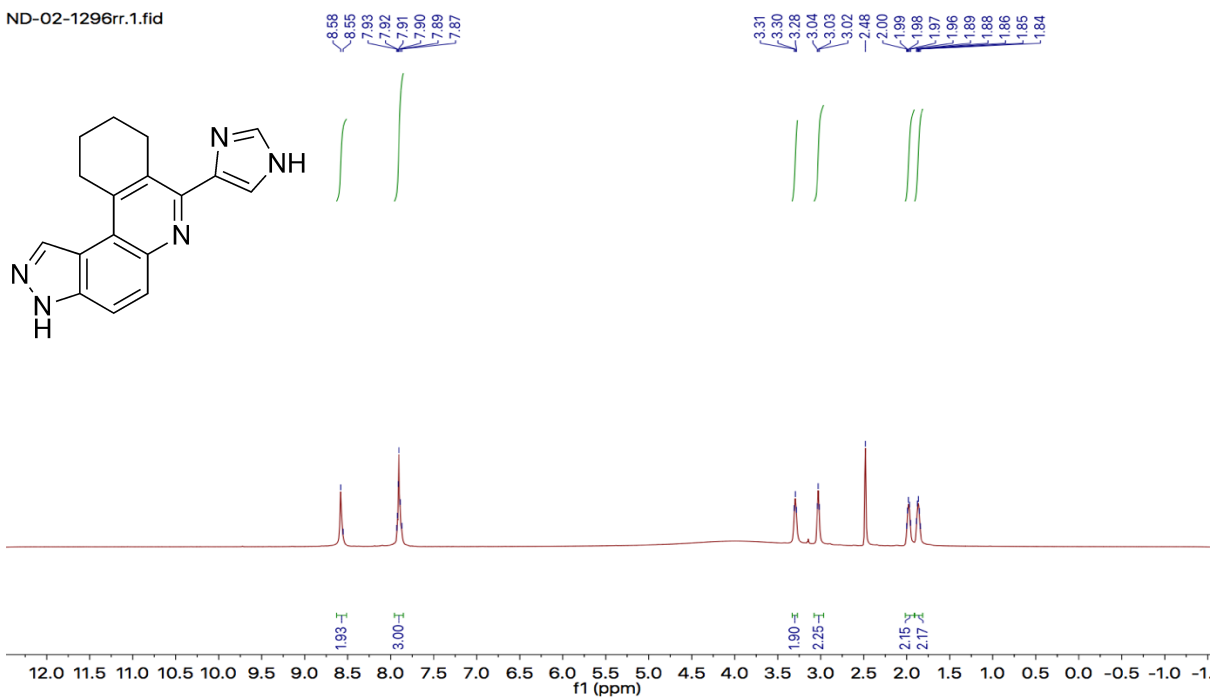

### <sup>13</sup>C spectra of 22

ND-02-1296rr.2.fid

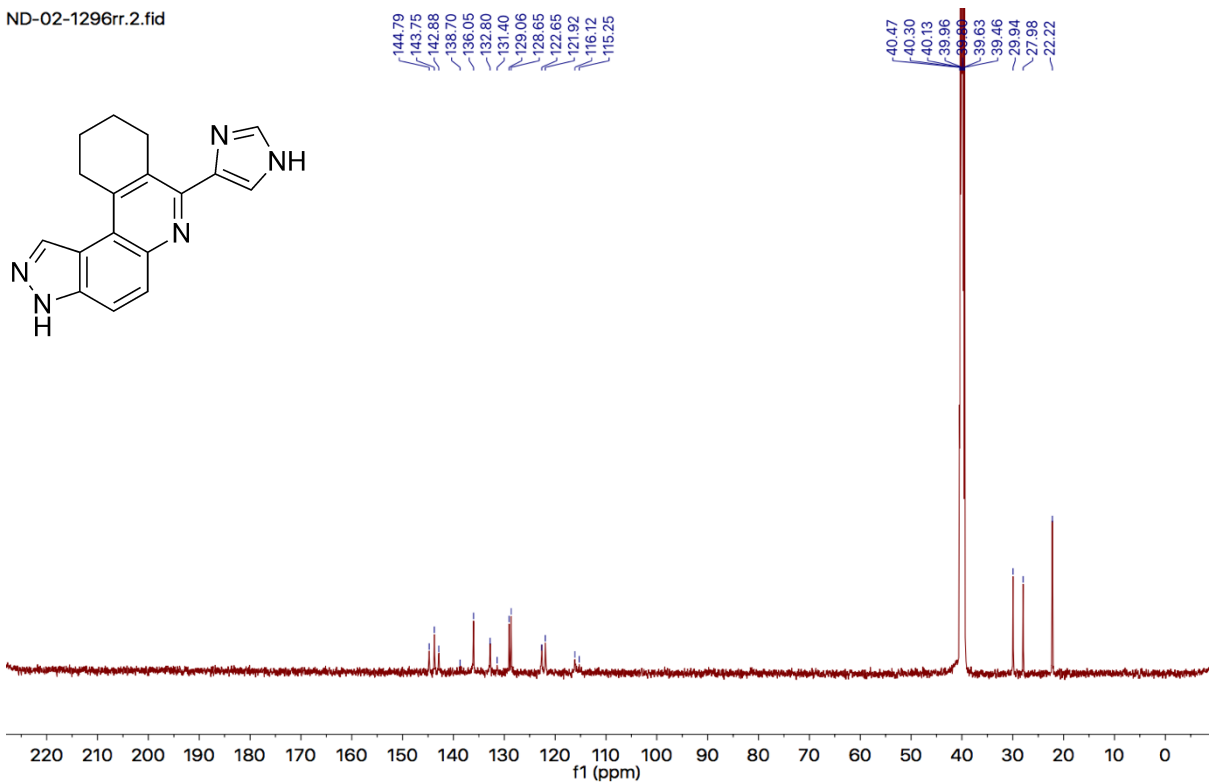

### <sup>1</sup>H spectra of 26

ndayal-H9a.1.fid

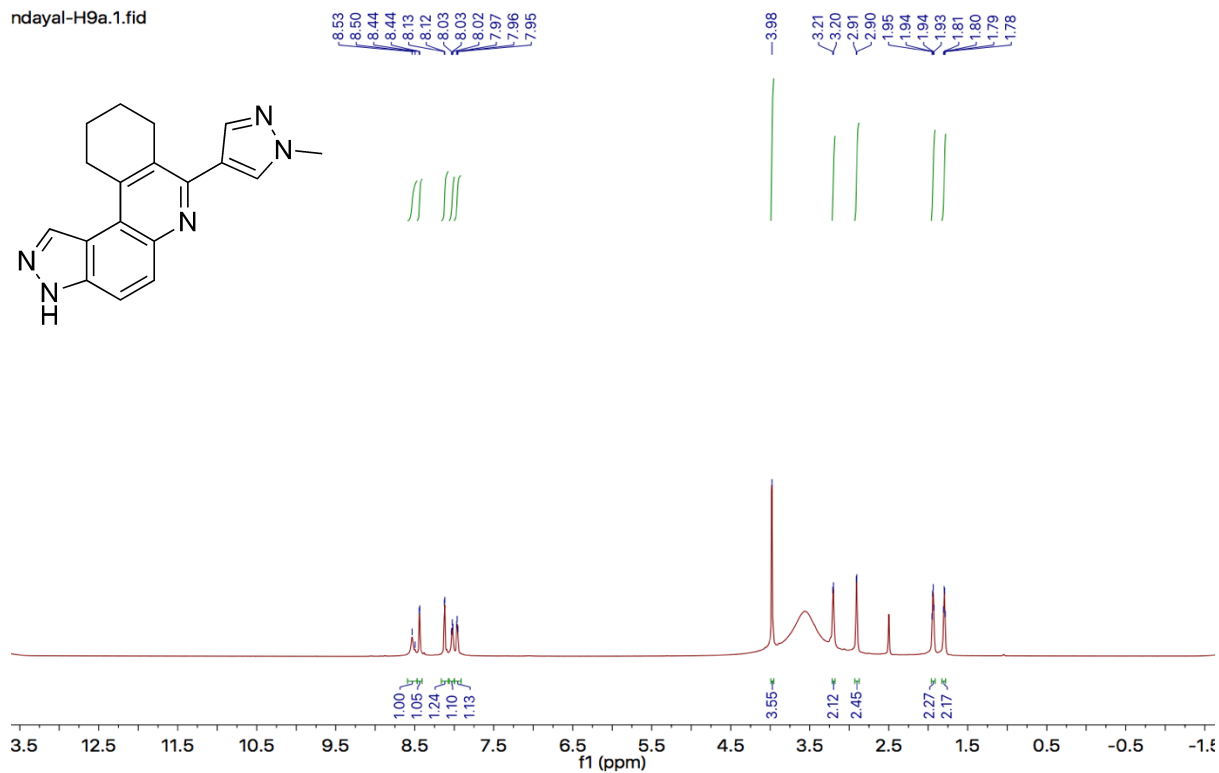

### <sup>13</sup>C spectra of 26

ndayal-H9a.2.fid

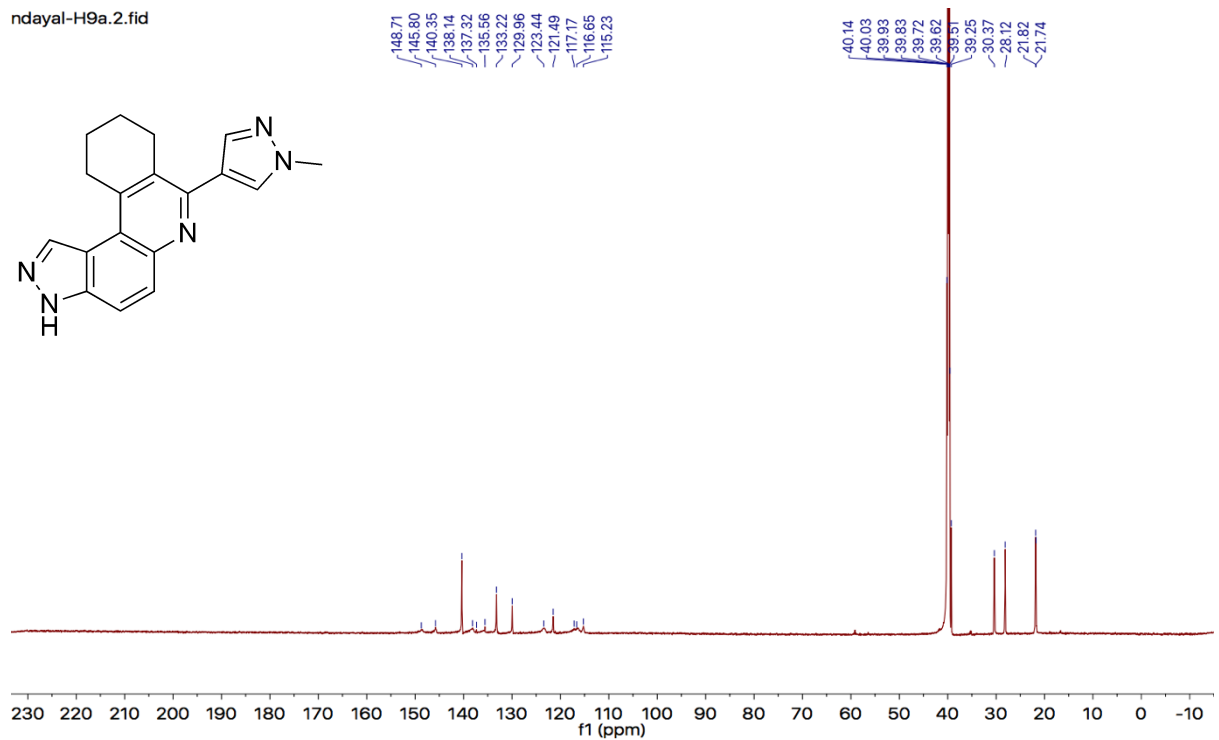

## II. HPLC Purity Chromatograms

a) UV detection wavelength 260 nm, Agilent Eclipse instrument; C18 column (3  $\mu\text{m}$ ,  $4.6 \times 100 \text{ mm}^2$ ); method: 0  $\rightarrow$  5 min 50% B, 5  $\rightarrow$  10 min 50 to 100% B, 10  $\rightarrow$  24 min 100% B, 24  $\rightarrow$  25 min 50% B (A: 0.1%  $\text{NH}_4\text{OH}$  in  $\text{H}_2\text{O}$ , B: MeOH), 25  $^\circ\text{C}$ .

b) UV detection wavelength 260 nm, Agilent Eclipse instrument; C18 column (3  $\mu\text{m}$ ,  $4.6 \times 100 \text{ mm}^2$ ); method: 0  $\rightarrow$  5 min 50% B, 5  $\rightarrow$  8 min 50 to 100% B, 8  $\rightarrow$  24 min 100% B, 24  $\rightarrow$  25 min 50% B (A: 0.1%  $\text{NH}_4\text{OH}$  in  $\text{H}_2\text{O}$ , B: MeOH), 25  $^\circ\text{C}$ .

### Compound 1077<sup>b</sup>

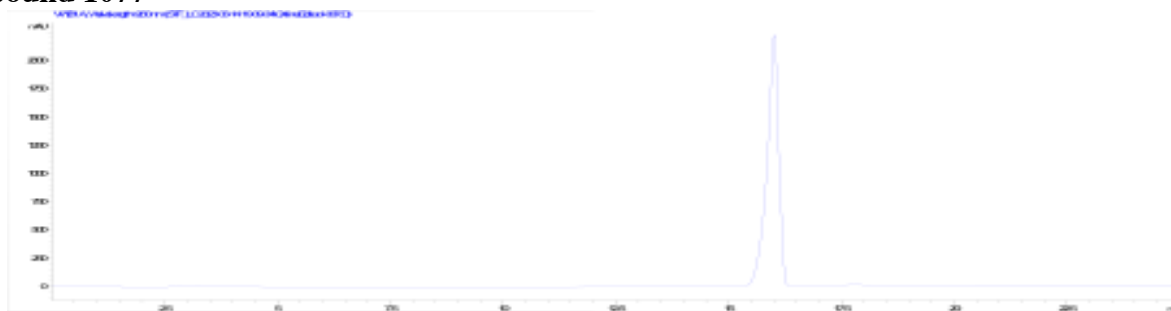

### Compound 1<sup>a</sup>

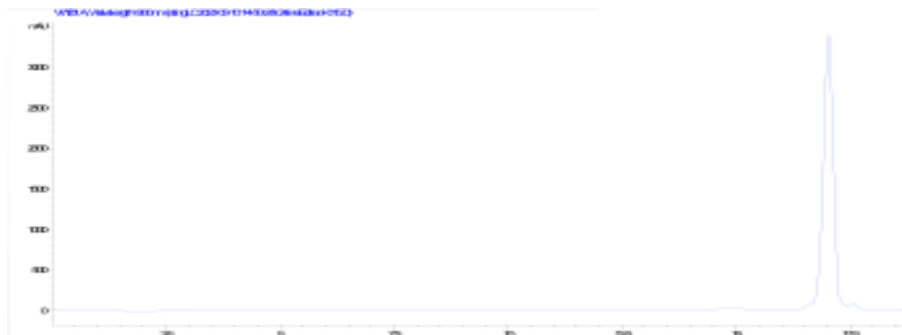

### Compound 2<sup>a</sup>

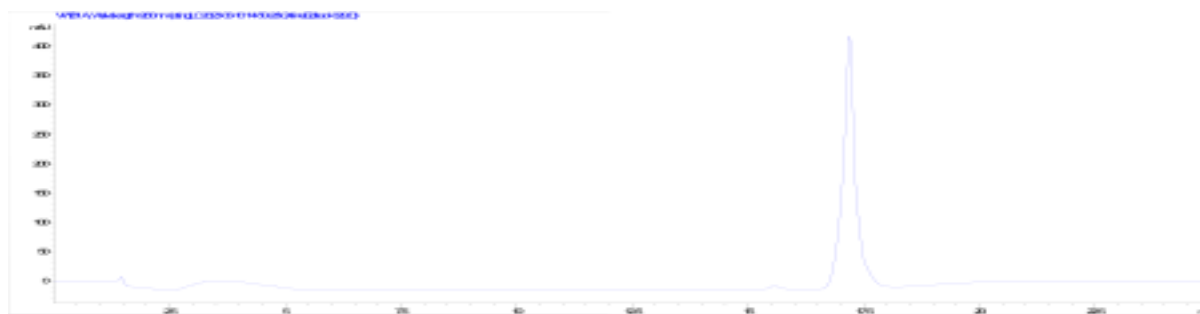

### Compound 3<sup>b</sup>

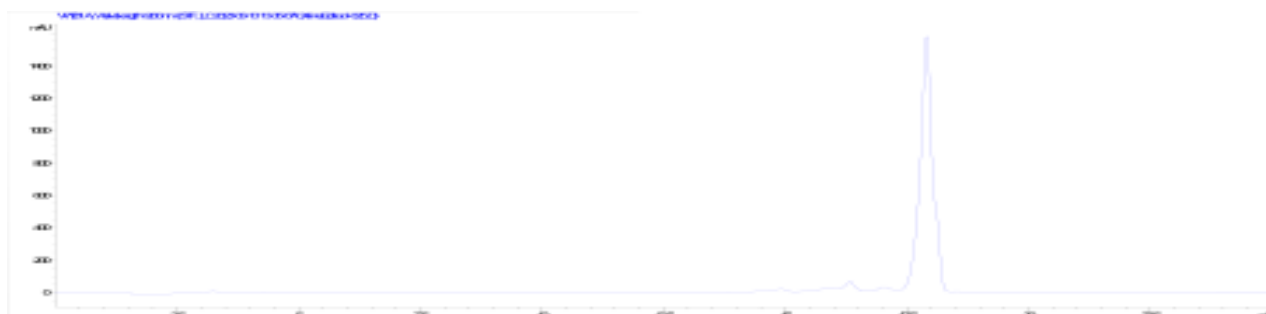

### Compound 5<sup>a</sup>

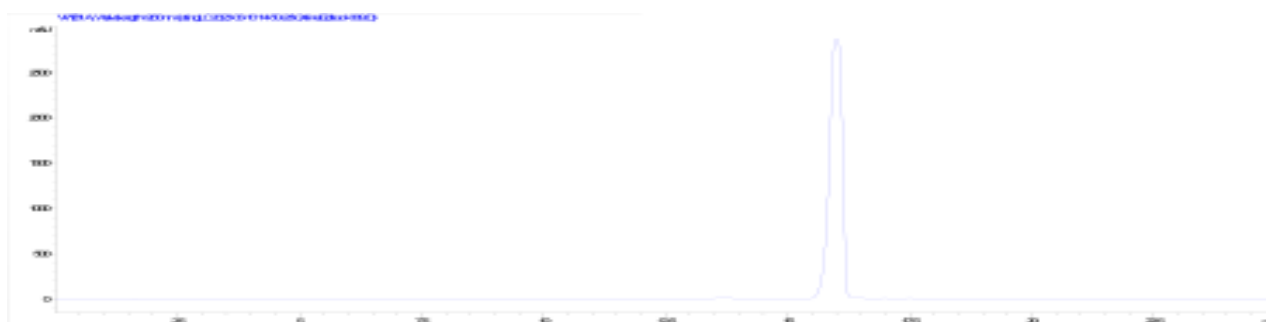

### Compound 6<sup>a</sup>

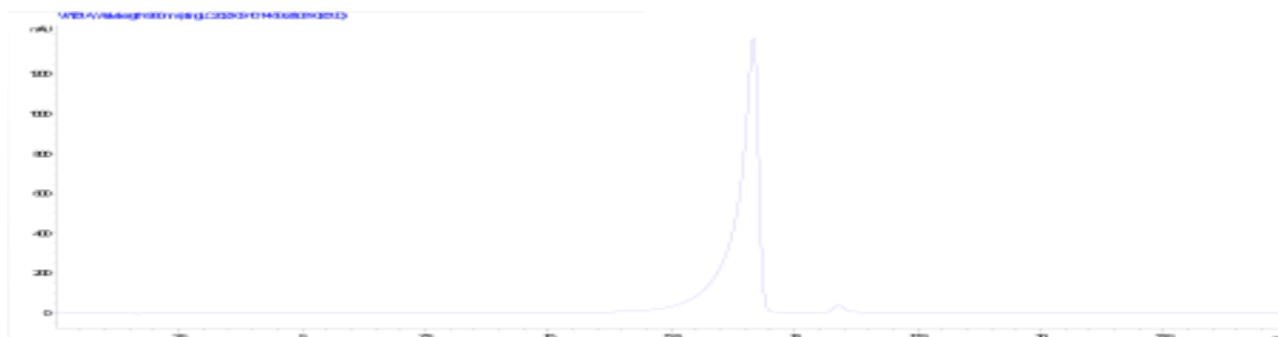

### Compound 7<sup>a</sup>

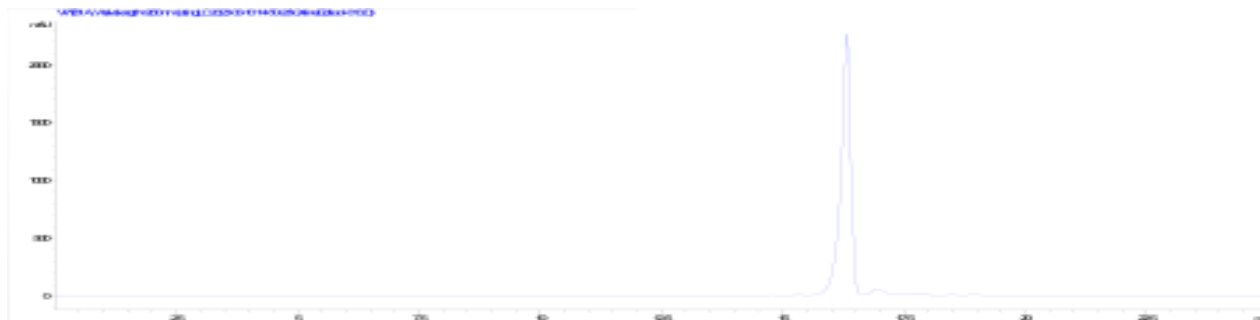

### Compound 8<sup>a</sup>

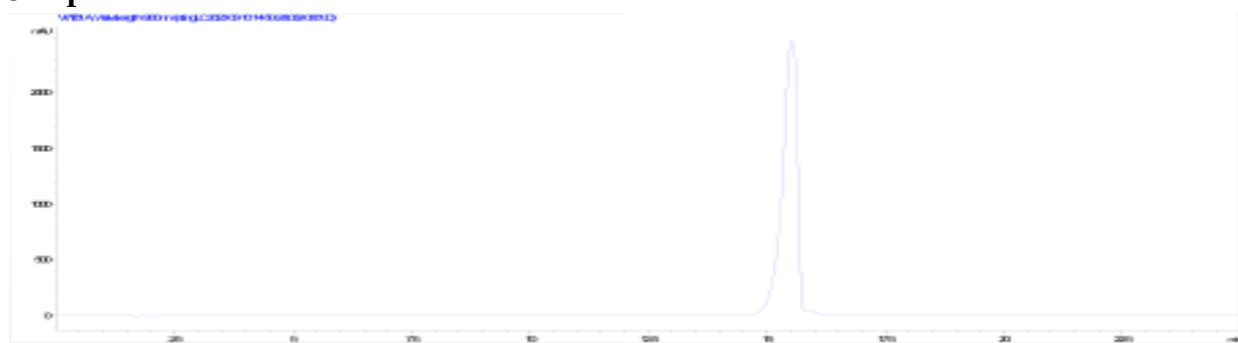

### Compound 9<sup>a</sup>

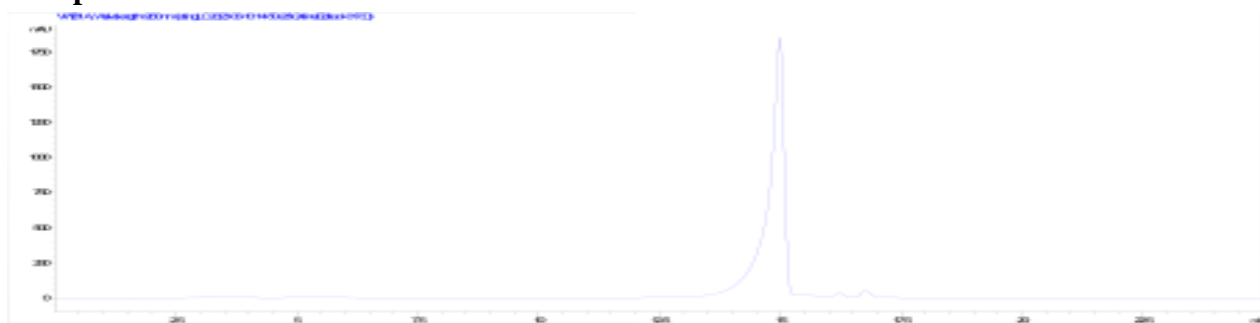

### Compound 10<sup>a</sup>

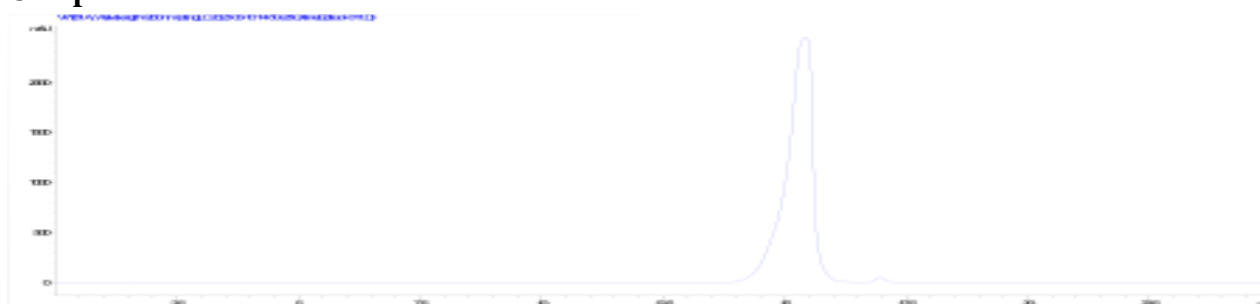



### Compound 11<sup>b</sup>

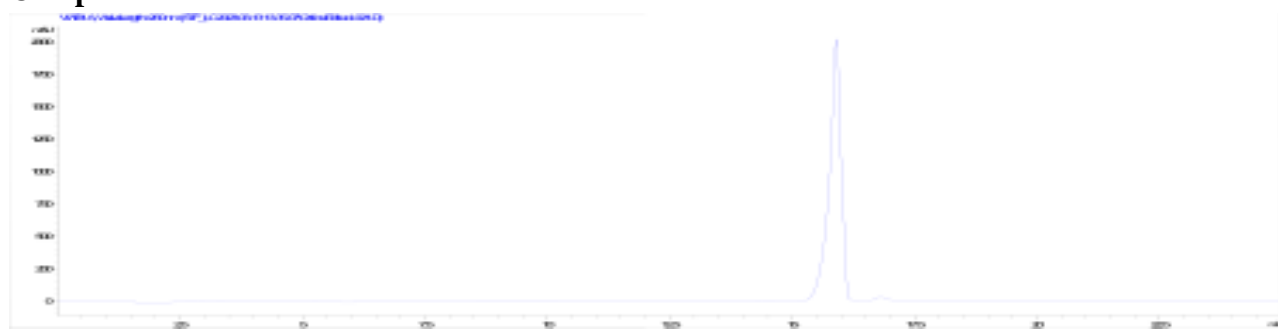

### Compound 12<sup>b</sup>

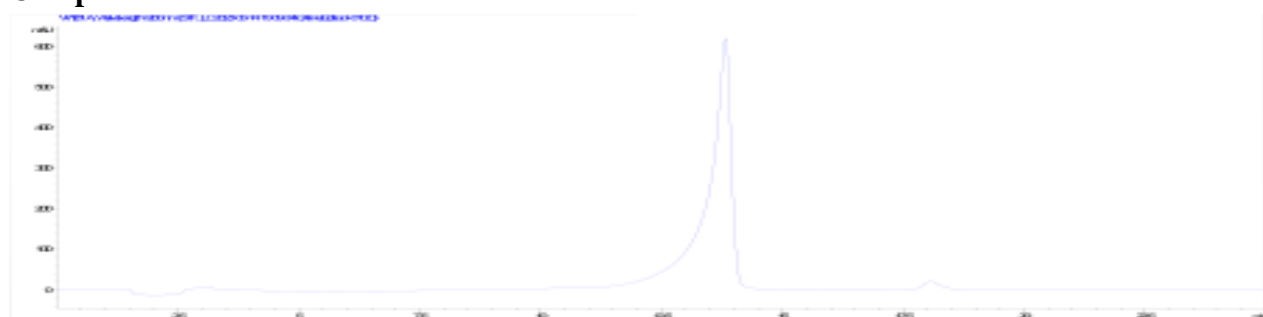

### Compound 13<sup>b</sup>

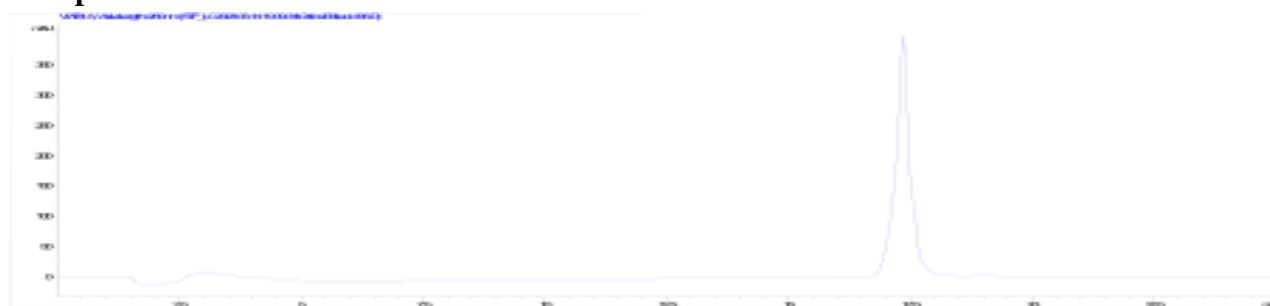

### Compound 14<sup>a</sup>

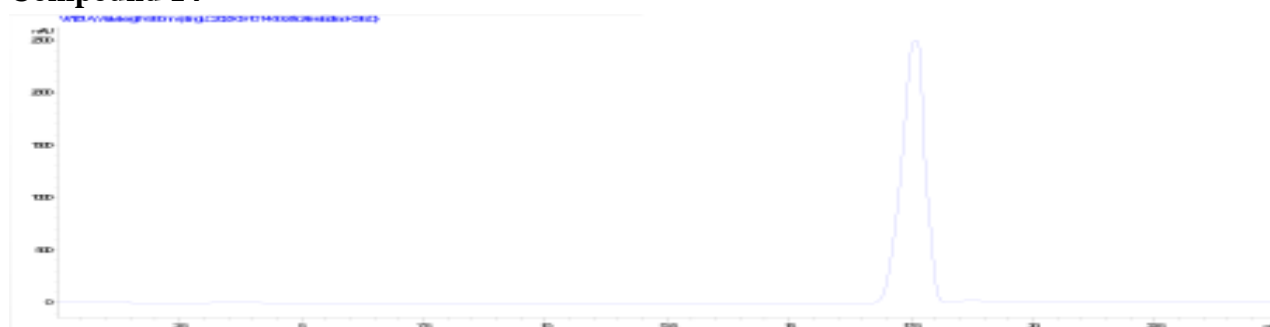

### Compound 15<sup>b</sup>

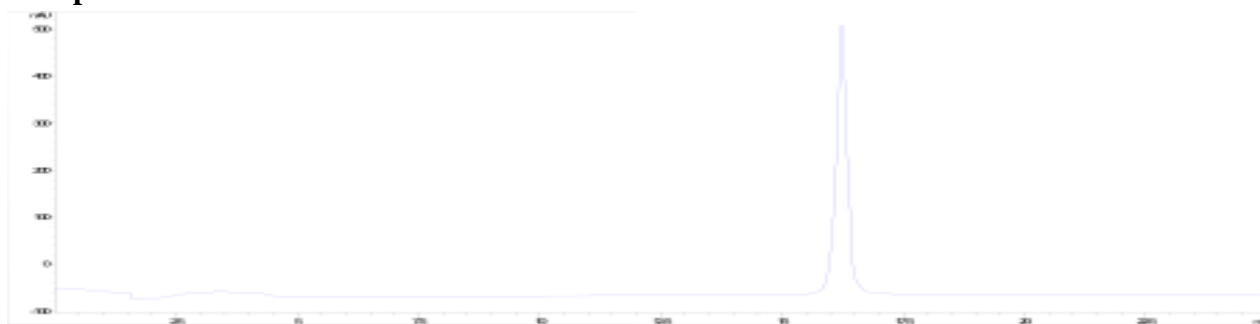

### Compound 16<sup>b</sup>

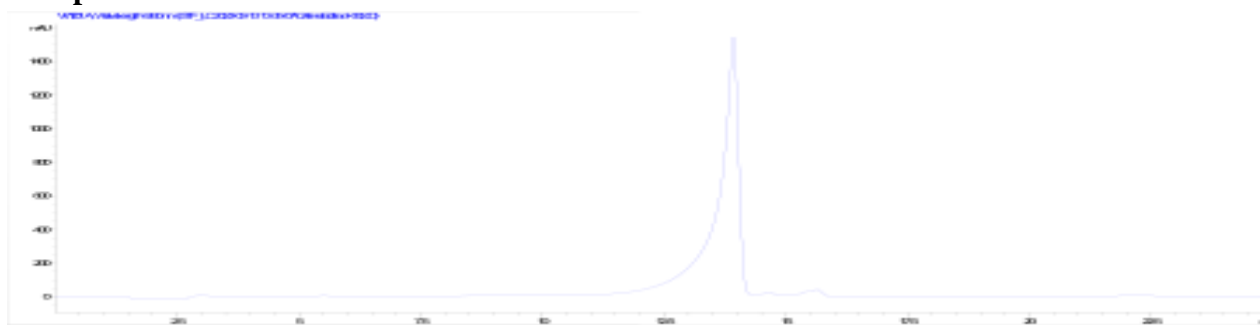

### Compound 17<sup>a</sup>

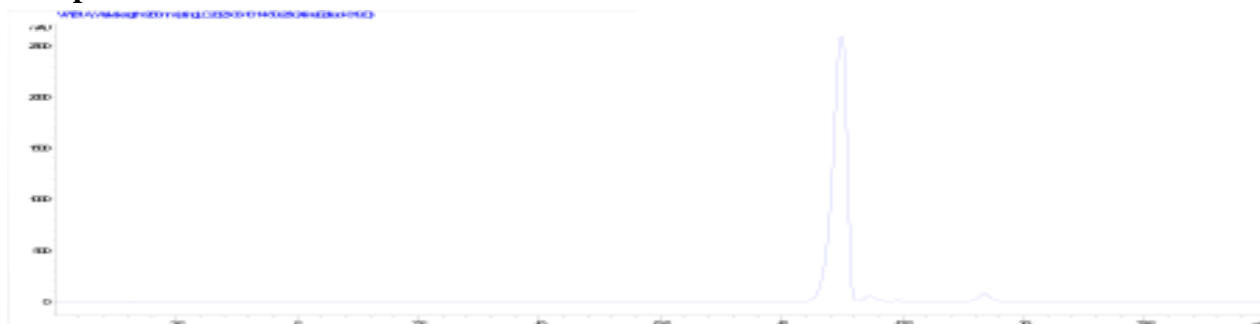

### Compound 21<sup>a</sup>

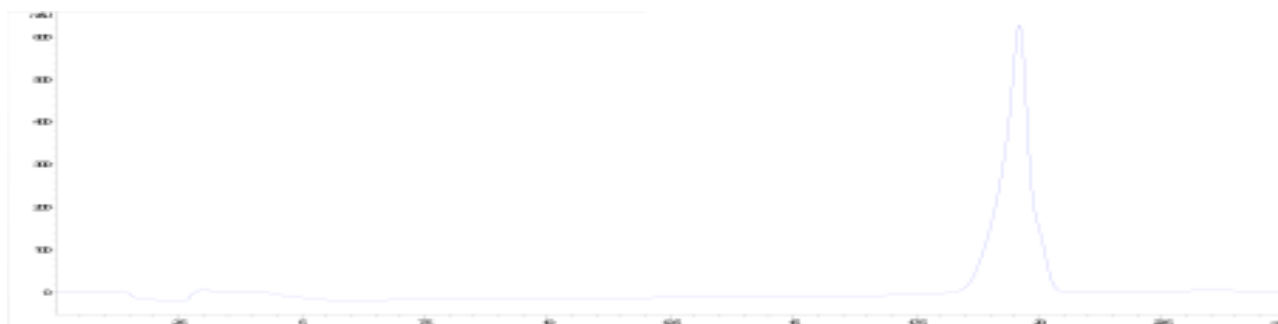

### Compound 22<sup>b</sup>

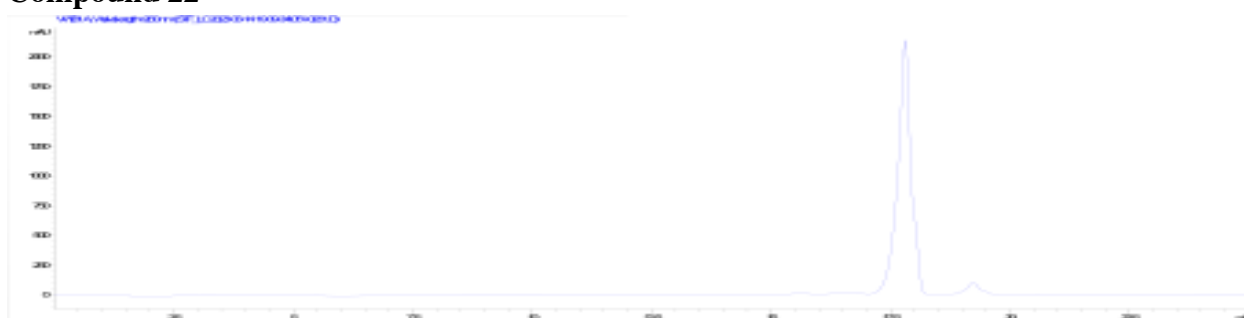

### Compound 24<sup>a</sup>

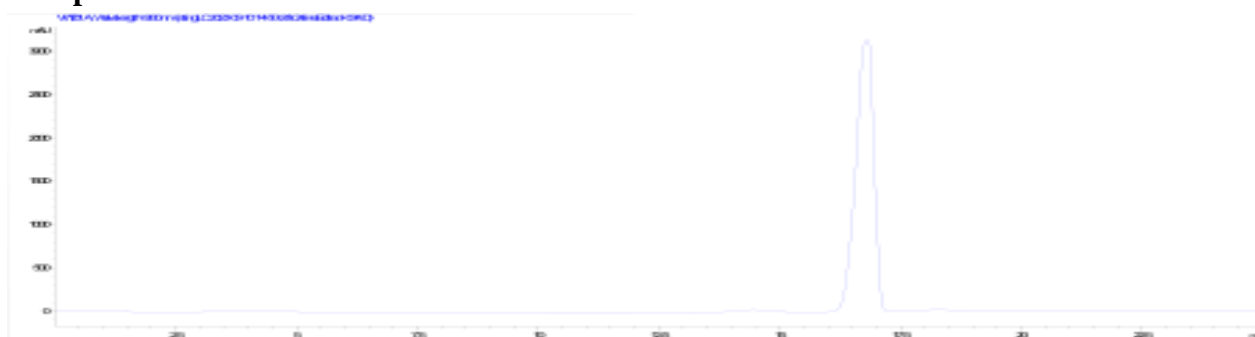

### Compound 25<sup>b</sup>

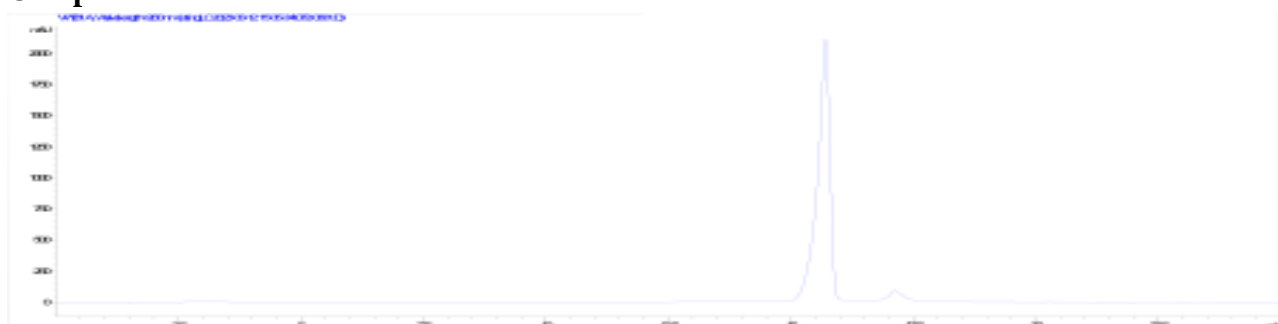

## Compound 26<sup>a</sup>

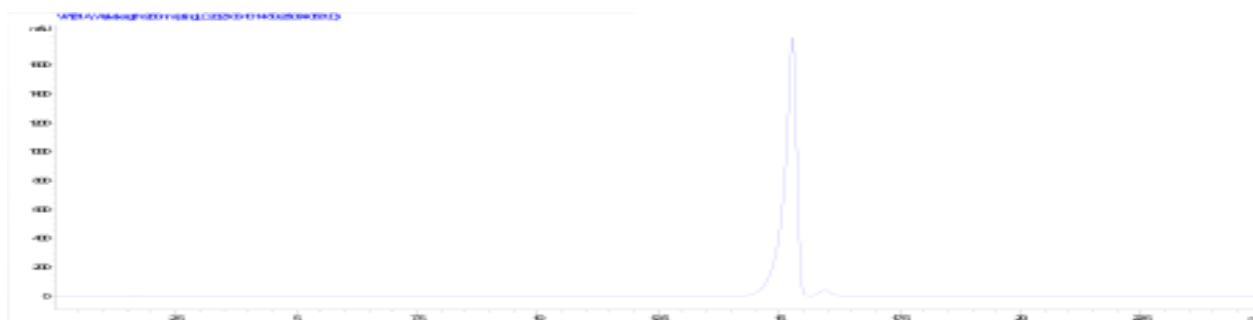

### III. Full blots of Western used in the paper

Phosphor-IRF3

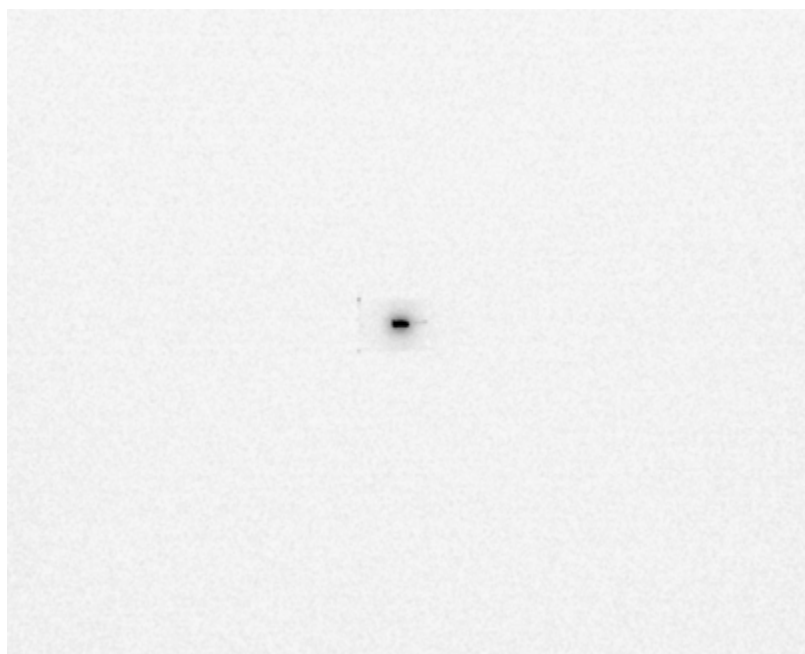

IRF3

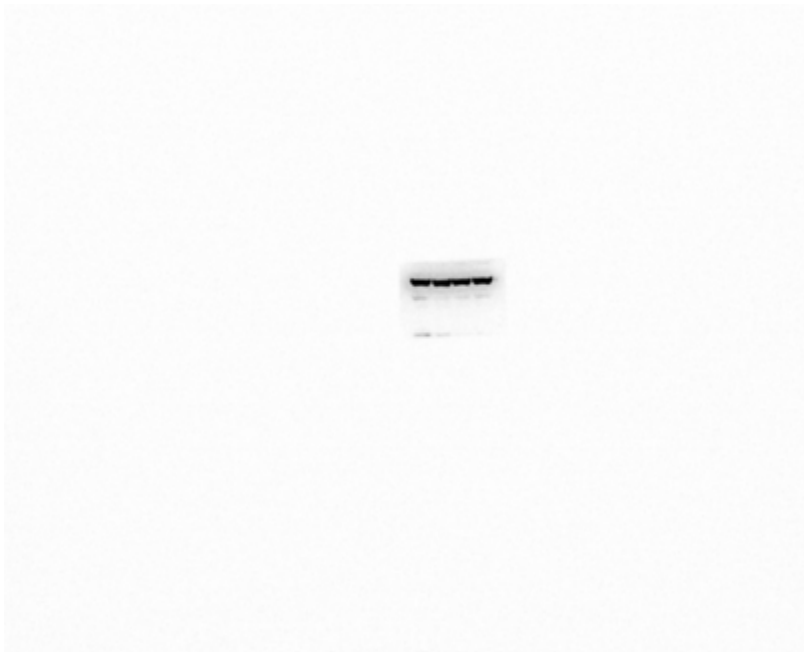

Phosphor-STING

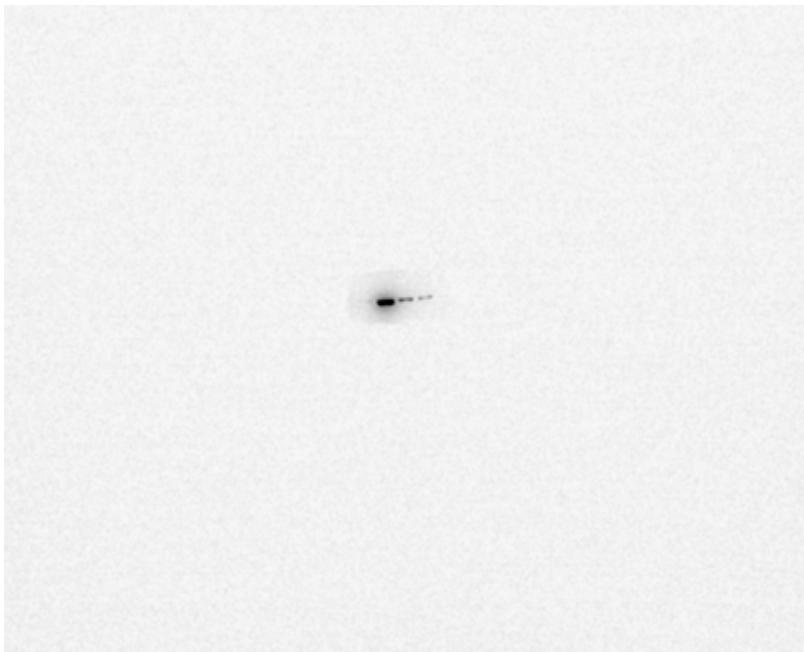

STING

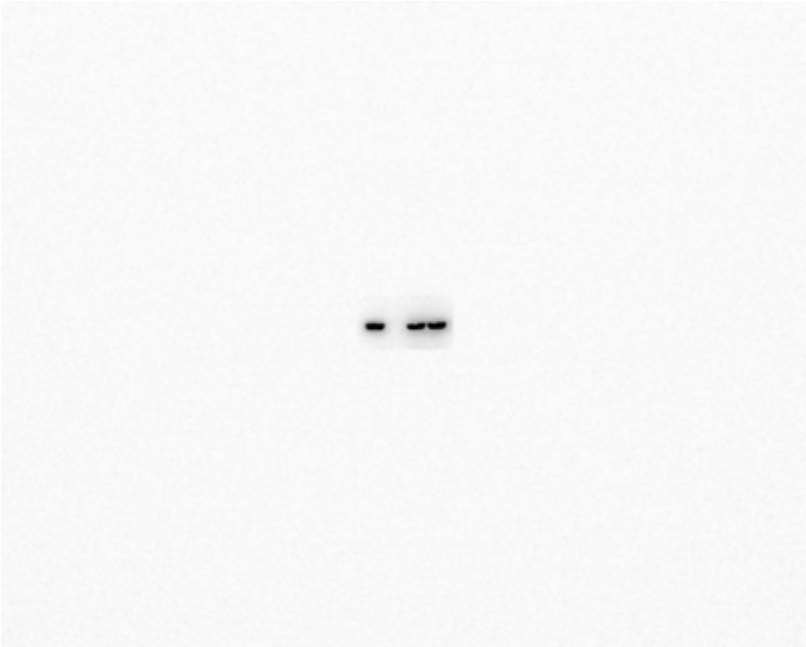

Beta-actin

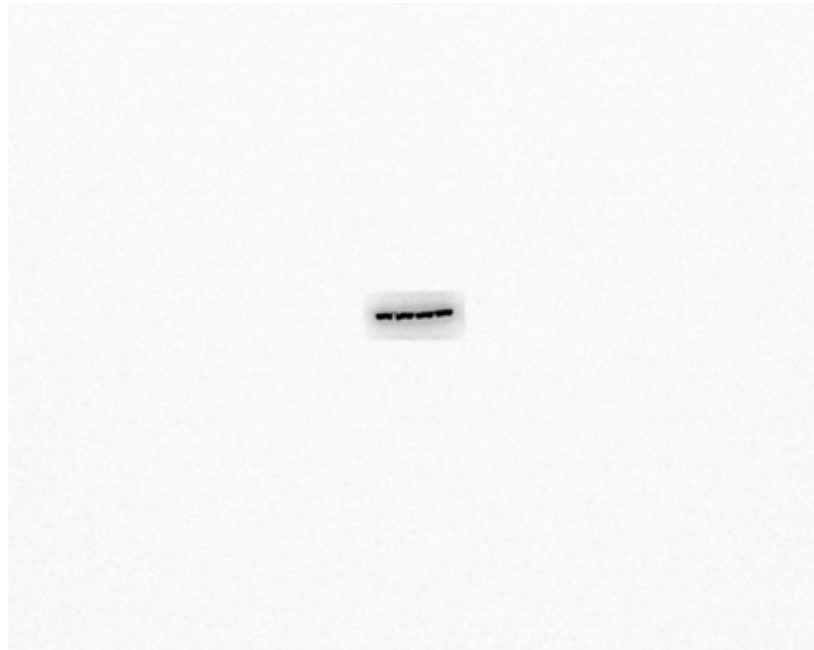

Supplement: d3md00061c1.pdf [file d3md00061c1.pdf]
